# Supplementary material for: Microbial degradation mechanism of historical silk revealed by proteomics and metabolomics
Source: Royal Society of Chemistry journal article supplement (doi:10.1039/d3ay01033c), 2023-01-01
Supplement: d3ay01033c1.pdf [file d3ay01033c1.pdf]

**Supplementary information (SI)**

**Microbial degradation mechanism of historical silk revealed by proteomics and metabolomics**

Lindan Pan<sup>‡a</sup>, Chuanmiao Ding<sup>‡a</sup>, Yefeng Deng<sup>a</sup>, Hao Chen<sup>a</sup>, Hailiang Yang<sup>b</sup>, Biyang Wang<sup>c</sup>, Yang Zhou<sup>b,\*</sup> and Bing Wang<sup>a,c,\*</sup>

a. Institute of Textile Conservation, Zhejiang Sci-Tech University, Hangzhou 310018, China

b. Key Scientific Research Base of Textile Conservation, State Administration of Cultural Heritage, China National Silk Museum, Hangzhou 310002, China

c. McDonald Institute for Archaeological Research, University of Cambridge, Cambridge CB2 3ER, United Kingdom

\*Email: wbing388@163.com (B. Wang) and csmzhouyang@126.com

Telephone and fax: +86-571-86843867.

‡ These authors contributed equally to this work.

## Data quality control in proteomics

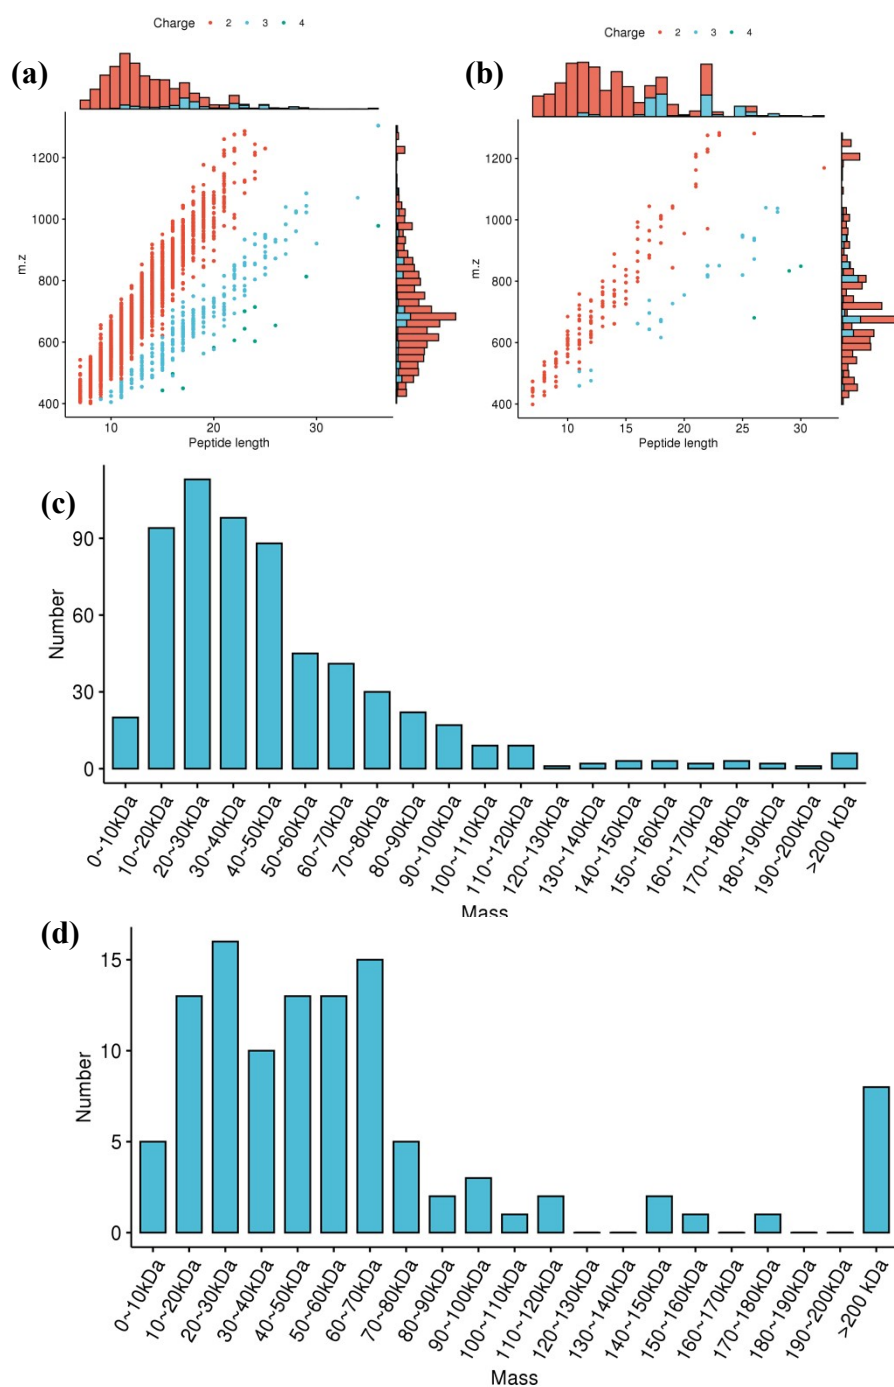

**Fig. S1.** Peptide length distribution of (a) artificially aged silk samples and (b) historical silk samples. Protein molecular weight distribution of (c) artificially aged silk samples and (d) historical silk samples.

Most of the peptide segments are distributed in 7-20 amino acids, which conforms to the general rule based on enzymatic hydrolysis and mass spectrometry fragmentation, suggesting that the length distribution of peptide identified by mass

spectrometry meets the quality control requirements. In addition, the identified proteins are distributed in all molecular weights.

## Data quality control in metabolomics

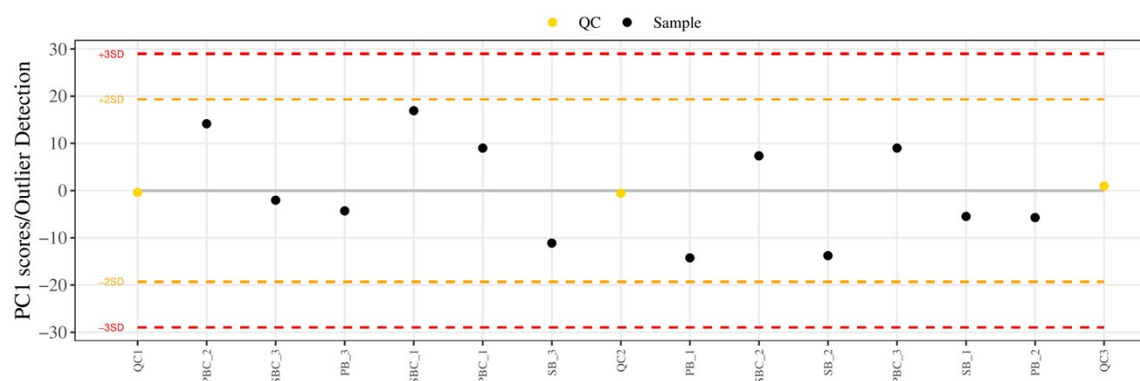

**Fig. S2.** Multivariate control chart, i.e., the position and changing trend of sample scoring points formed according to sample data of SBC vs. SB and PBC vs. PB.

As shown in Fig. S2, each point represents a sample. The black point is the test sample, and the color point is the QC sample. The X-axis is the machine detection sequence of all samples, and the vertical axis is the first principal component score of the sample principal component analysis. Generally, most points will fluctuate up and down around the X-axis within 2 standard deviations, and points exceeding 3 standard deviations are considered outliers. Apparently, the samples measured in this work are in a controlled state.

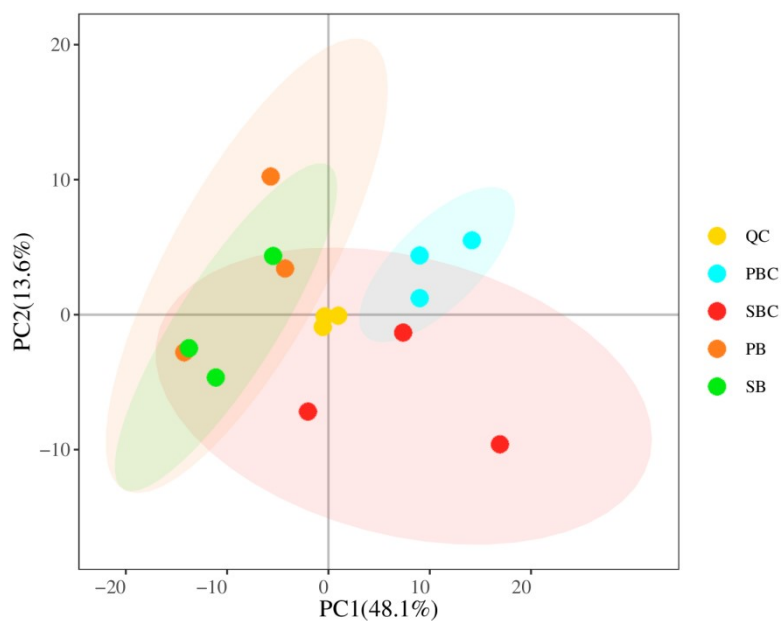

**Fig. S3.** Principal Component Analysis of all samples (including QC samples).

PCA analysis is an unsupervised method, which helps to observe the original features of the data. In Fig. S3, QC sample points are close to each other and clustered together to a high degree, indicating good stability of instrument detection.

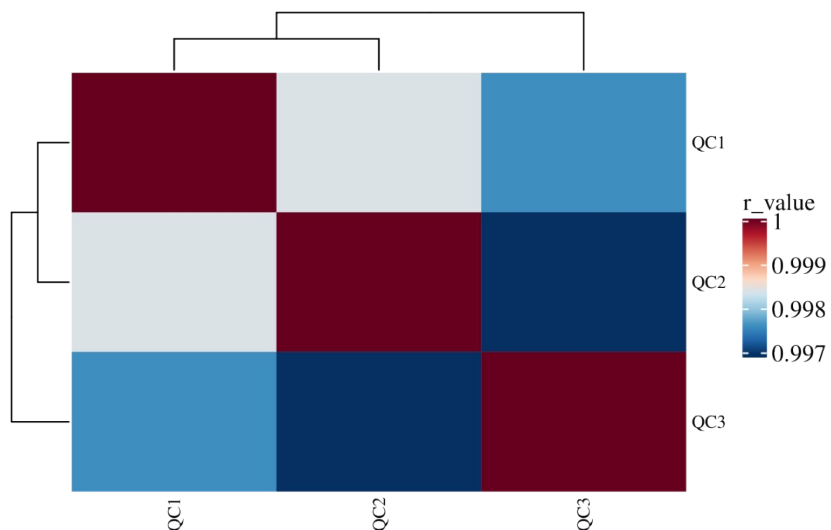

**Fig. S4.** Correlation heat map among QC samples.

The color of each grid in the heat map represents the correlation coefficient between one QC sample and other QC samples. The closer the correlation coefficient is to 1, the closer the QC samples are, which indicates that the more stable the test data is and the better the experimental quality control effect is.

## Morphology of ancient silk fibers

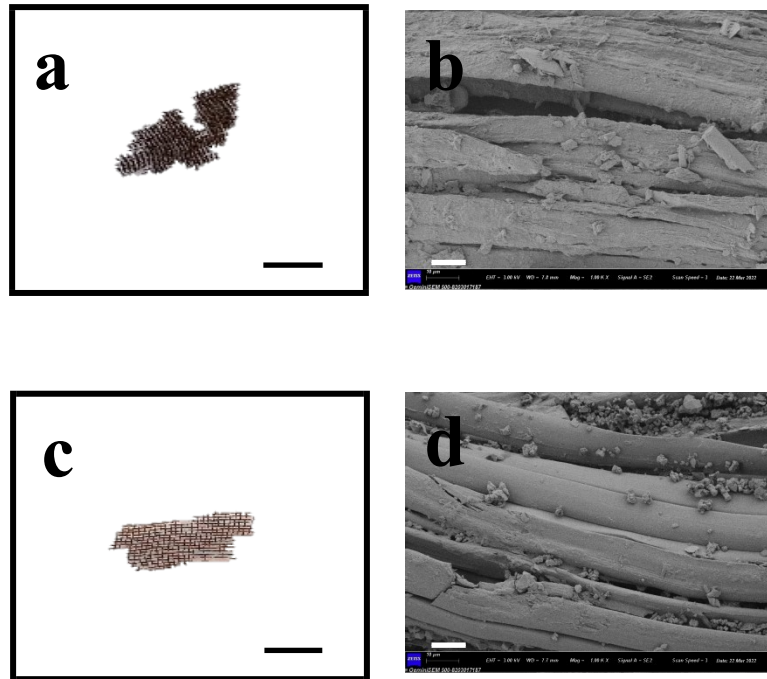

**Fig. S5.** (a) and (c) are digital images of AS\_SX and AS\_XJ respectively. Scale bars of digital images are 1 cm. (b) and (d) are SEM images of ancient samples AS\_SX and AS\_XJ respectively. Scale bars of SEM images are 10  $\mu\text{m}$ .

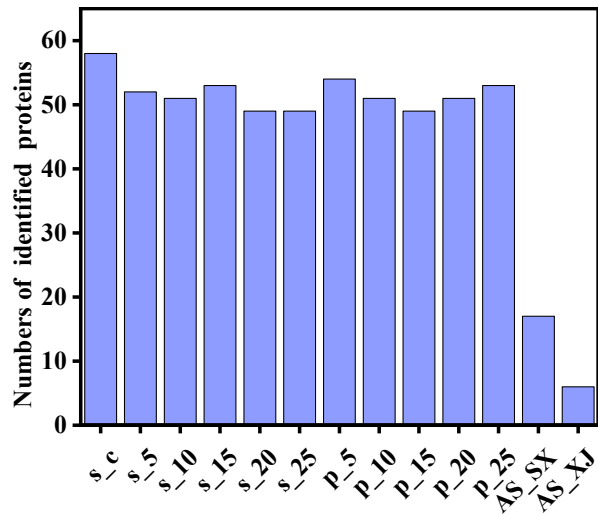

**Fig. S6.** Numbers of identified proteins in artificially aged silks and historical silks.



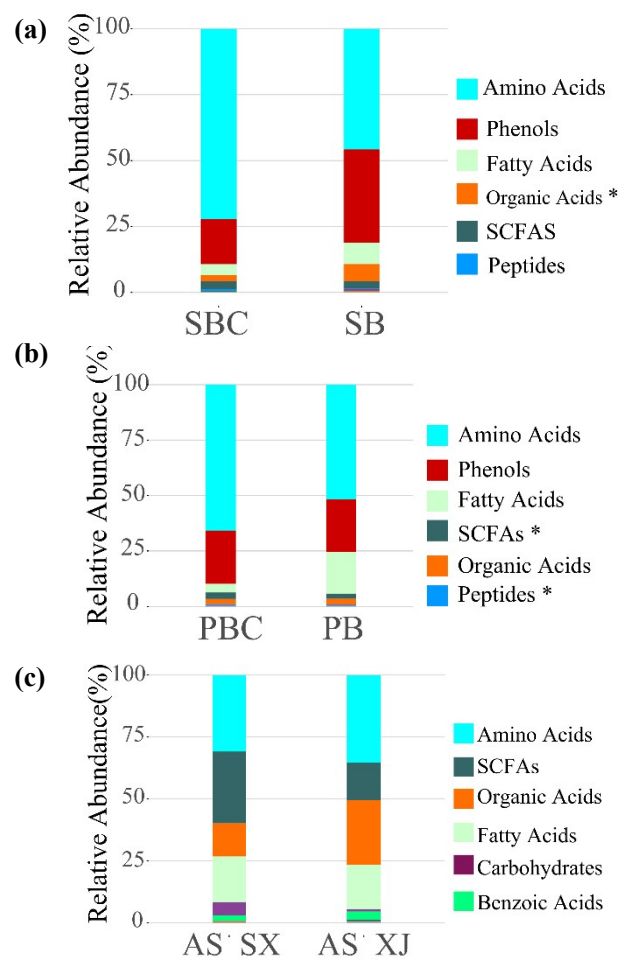

**Fig. S7.** Relative abundance of different metabolite classes from (a) SBC vs. SB, (b) PBC vs. PB, and (c) archaeological silks. \*: classes of metabolites with significant difference ( $p < 0.05$ ).

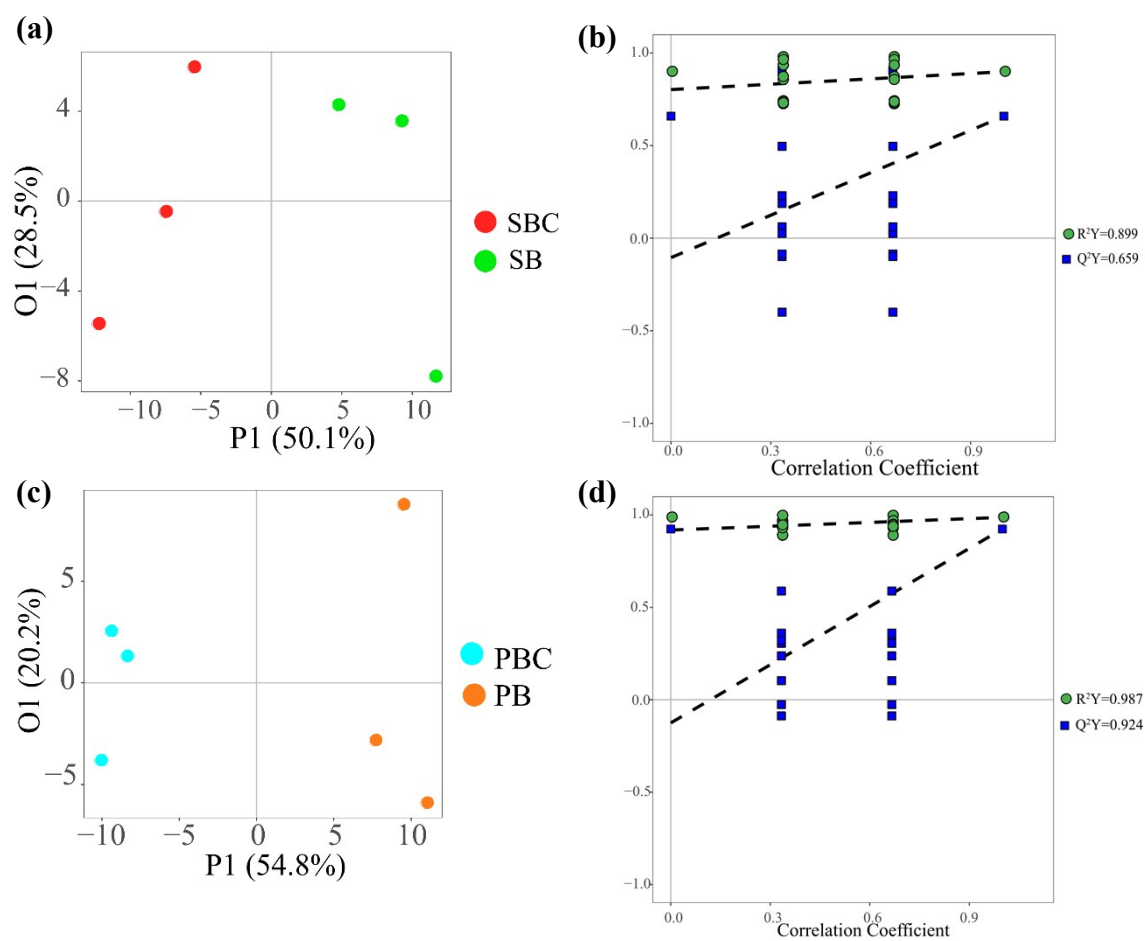

**Fig. S8.** (a) OPLS-DA model of metabolites from SBC and SB. (b) Permutation test results of the OPLS-DA model of metabolites from SBC and SB. (c) OPLS-DA model of metabolites from PBC and PB. (d) Permutation test results of the OPLS-DA model of metabolites from PBC and PB.

/895623.8653.8528520

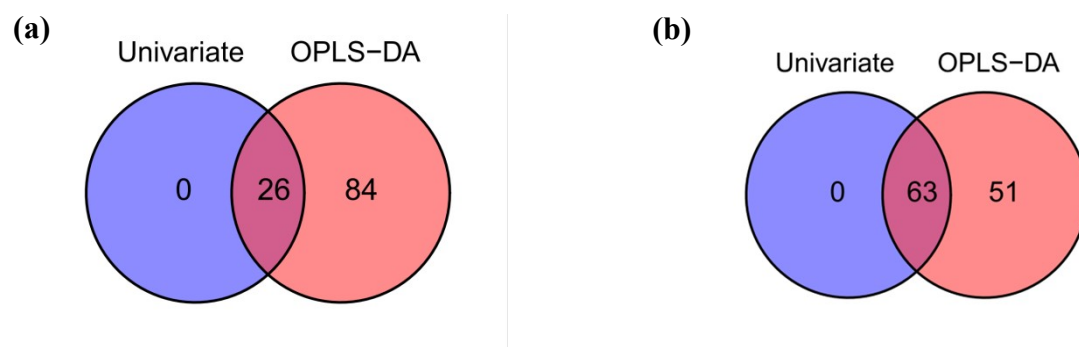

**Fig. S9.** Screening of differential metabolites. (a) and (b) are Venn plots for the common differential metabolites screened with univariate analysis and multidimensional analysis based on OPLS-DA from SBC vs. SB and PBC vs. PB, respectively.

## FTIR and secondary structure

A Tensor 27 infrared spectrometer (Bruker Corporation, Germany) was used to analyze the infrared absorption spectrum of the collected silk samples with a wavenumber range of 400-4000  $\text{cm}^{-1}$ . The change in secondary structure was obtained by peak fitting of the amide I region<sup>1</sup> (1600-1700  $\text{cm}^{-1}$ ). Fourier deconvolution was applied to locate the positions of the peaks. Spectra were deconvoluted with a Gaussian curve in the following steps: (1) The peak position was fixed; the peak width was constrained to a maximum of 50 and a minimum of 5, and the peak area was changed from 0 to 20 limit, and the tolerance was set to 1E-5. After that, iterative fitting was carried out until no change was observed between two consecutive reports. (2) The peak area was fixed, and the fitting was iterated until convergence was achieved.

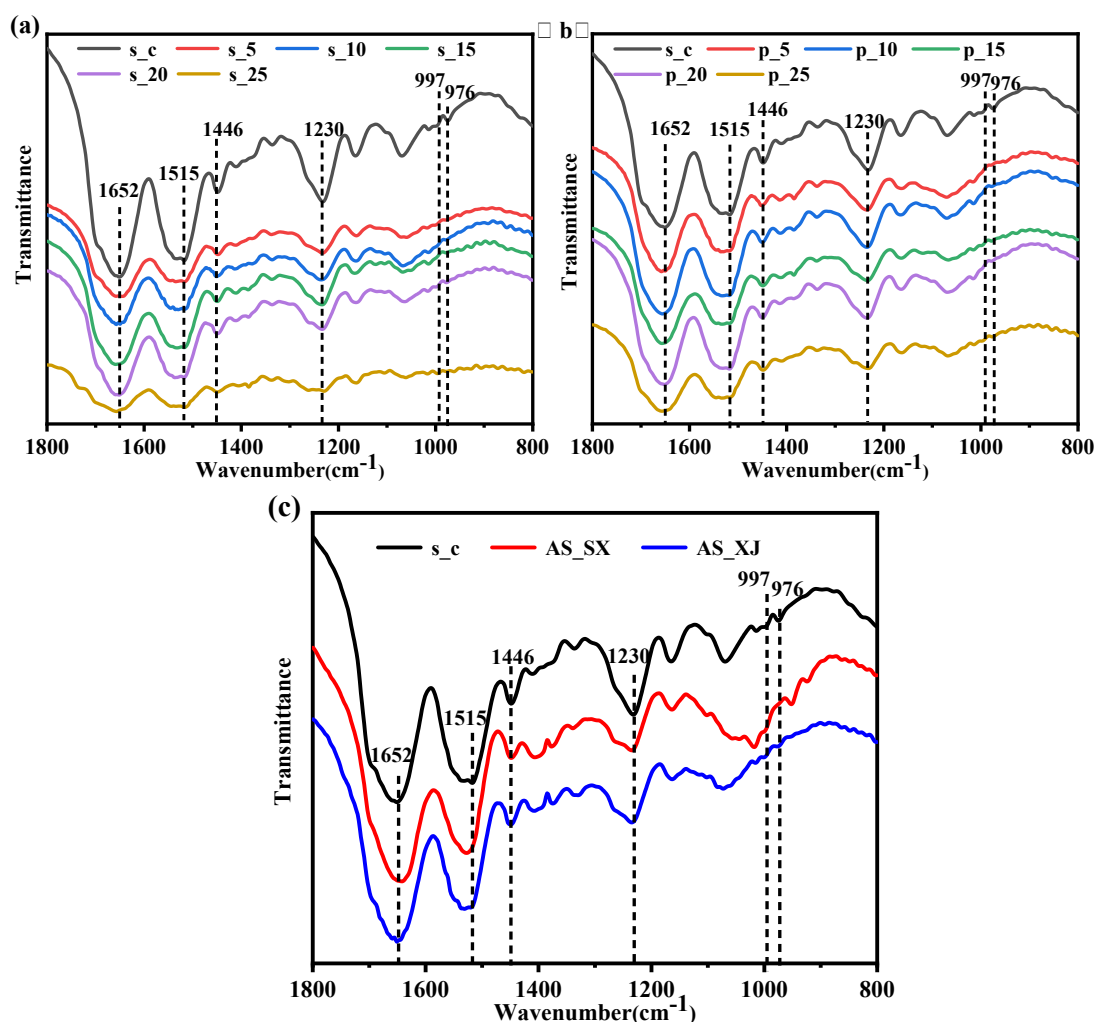

**Fig. S10.** FTIR spectra of silk samples: (a) and (b) are artificial aging silks treated with *S. maltophilia* and *P. alcaligenes*, respectively; (c) historical silks

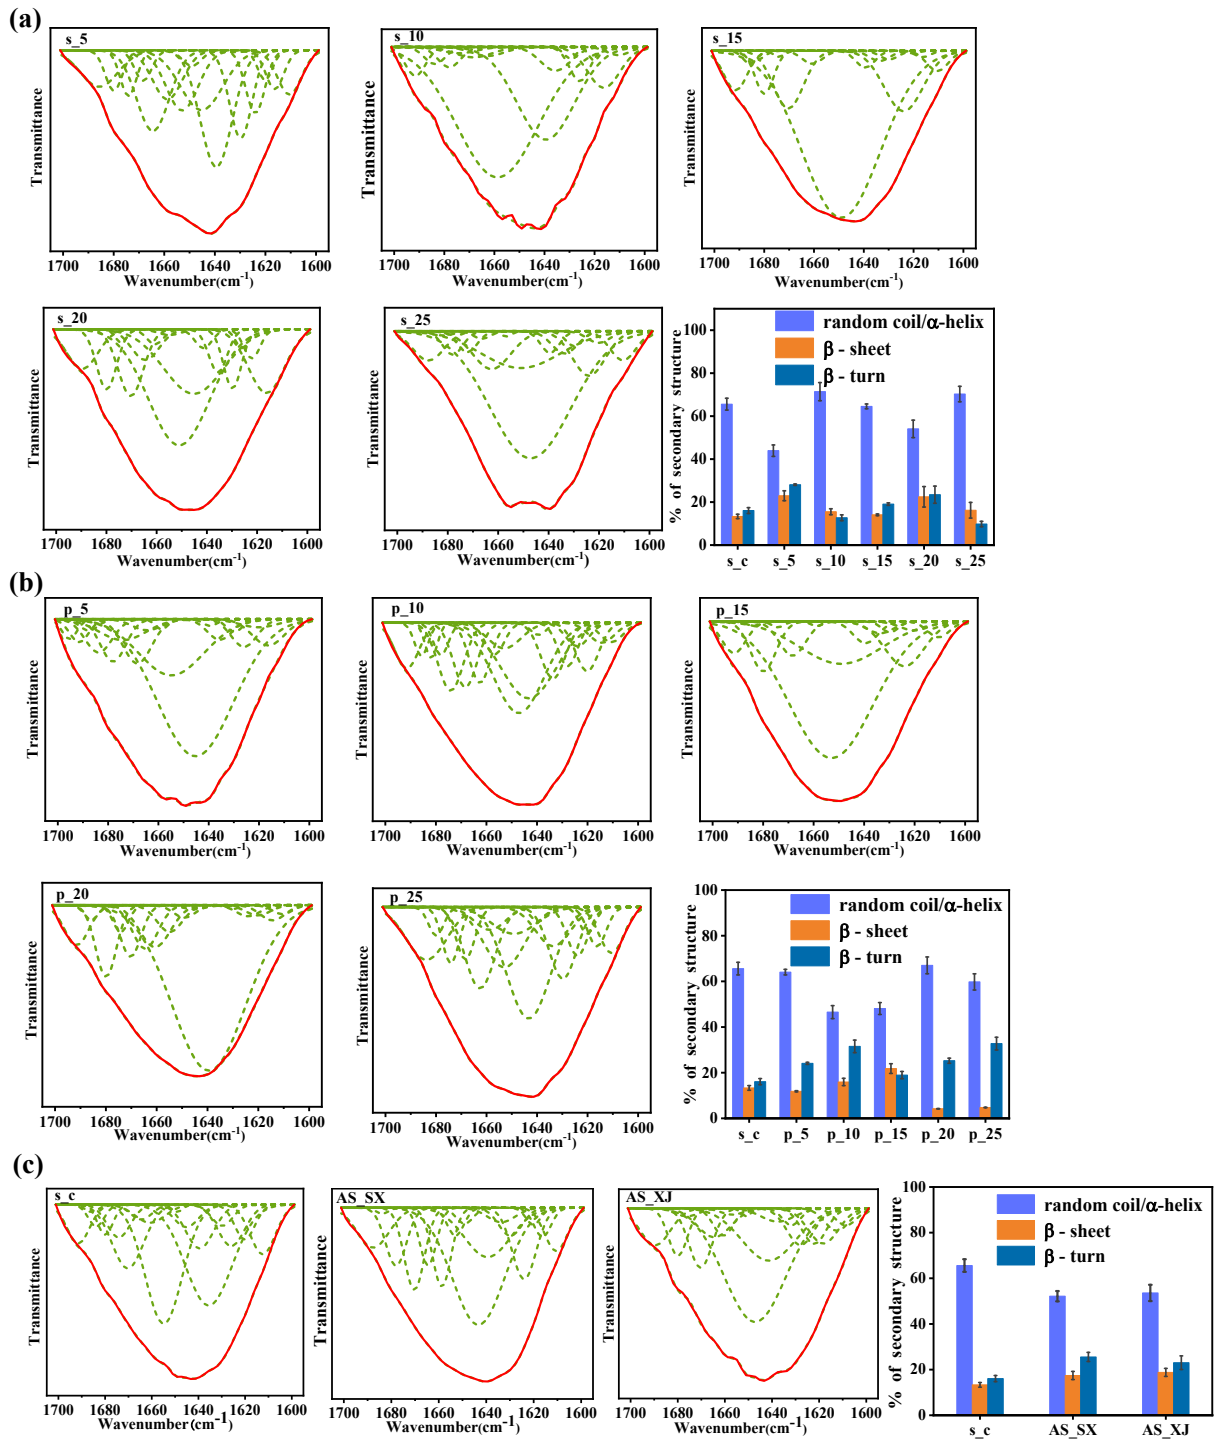

**Fig. S11.** The deconvolution results of FTIR spectra and the corresponding content of secondary structure of (a) artificially aged silks treated with *S. maltophilia*, (b) artificially aged silks treated with *P. alcaligenes* and (c) historical silks.

The FTIR spectra of all artificial silk samples are shown in Fig. S3. The characteristic absorption peak at  $1652\text{ cm}^{-1}$  and  $1230\text{ cm}^{-1}$  due to the random coil conformation in the amide I region and amide III region<sup>2</sup>, respectively, and the characteristic absorption peak at  $1515\text{ cm}^{-1}$  and  $1446\text{ cm}^{-1}$  in the amide II region due

to the  $\beta$ -sheet conformation are observed. After bacterial degradation, the random coil and  $\beta$ -sheet conformations of the silk samples are destroyed. In addition, the characteristic absorption peaks<sup>3, 4</sup> at 997  $\text{cm}^{-1}$  and 976  $\text{cm}^{-1}$  from  $\text{CH}_3$  rocking of the typical sequence Gly-Ala and C-C skeletal stretching modes of the typical sequence Gly-Gly in *B. mori* silk gradually disappeared, revealing that severe degradation in the silk molecular chain and microcrystalline region composed of regular repetitive sequences occurred.

To comprehensively show the influence of bacterial degradation on the conformation of silk fibers, the change in secondary structure was obtained from deconvolution of the FTIR spectrum (Fig. S4). In the s\_5, s\_10, s\_15, s\_20, and s\_25 samples, it is notable that the decrease and increase in random coil/ $\alpha$ -helix proportion are accompanied by the increase and decrease in  $\beta$ -sheet and  $\beta$ -turn proportions, respectively. In the p\_5, p\_10, and p\_15 samples, the increase and decrease in random coil/ $\alpha$ -helix proportions are likewise accompanied by the decrease and increase in  $\beta$ -sheet and  $\beta$ -turn proportions, respectively; however, in p\_20, the content of random coil increases, and that of  $\beta$ -sheet decreases sharply until the 25<sup>th</sup> day, and only the  $\beta$ -turn content responds to the change in random coil content. In the antique silk samples AS\_SX and AS\_XJ, the contents of various conformations are similar, which may be due to the same state of preservation. According to previous work<sup>5-8</sup>, the changes in secondary structure were attributed to (1) conformations of artificially aged samples are transformed into each other by bacterial biological interactions; that is,  $\beta$ -sheets,  $\alpha$ -helices,  $\beta$ -turns, and random coils could be transformed into each other; (2) the collected silk samples are independent of each other, and the changes shown are the consequences of degradation of the silk samples by bacteria, which may result from indirect conformational damage caused by the destruction of the structural sequence and direct conformation damage.

**Table S1** Detailed information on historical fabrics.

| <b>Sample</b> | <b>Age</b>                        | <b>Site location</b>                                   | <b>Burial condition</b>                                                            |
|---------------|-----------------------------------|--------------------------------------------------------|------------------------------------------------------------------------------------|
| AS_SX         | Ming Dynasty<br>(~1504 AD)        | Taiyuan, Shanxi<br>Province, China                     | Unearthed from Ming<br>tomb, hot and rainy in<br>summer, cold and dry<br>in winter |
| AS_XJ         | Han-Jin period (202<br>BC–420 AD) | Yingpan burial site,<br>Korla City, Xinjiang,<br>China | Unearthed from the<br>ancient castle in the<br>desert, arid and<br>rainless        |

**Table S2 UPLC-MS/MS instrument settings in metabolites quantification.**

| <b>UPLC</b>                                          |                                                                                                                                                                   |
|------------------------------------------------------|-------------------------------------------------------------------------------------------------------------------------------------------------------------------|
| <b>Column</b>                                        | ACQUITY UPLC BEH C18 1.7 $\mu$ M<br>VanGuard pre-column<br>(2.1 $\times$ 5 mm) and ACQUITY UPLC BEH C18<br>1.7 $\mu$ M<br>analytical column (2.1 $\times$ 100 mm) |
| <b>Column Temp. (<math>^{\circ}</math>C)</b>         | 40                                                                                                                                                                |
| <b>Sample Manager Temp. (<math>^{\circ}</math>C)</b> | 10                                                                                                                                                                |
| <b>Mobile Phases</b>                                 | A=water with 0.1% formic acid; and<br>B=acetonitrile / IPA (70:30)                                                                                                |
| <b>Gradient Conditions</b>                           | 0-1 min (5% B), 1-11min (5-78% B), 11-13.5<br>min (78-95% B), 13.5-14 min (95-100% B),<br>14-16 min (100% B), 16-16.1 min (100-5%<br>B), 16. 1-18 min (5% B)      |
| <b>Flow Rate (mL/min)</b>                            | 0.4                                                                                                                                                               |
| <b>Injection Vol. (<math>\mu</math>l)</b>            | 5.0                                                                                                                                                               |
| <b>MASS SPECTROMETER</b>                             |                                                                                                                                                                   |
| <b>Capillary (Kv)</b>                                | 1.5 (ESI+), 2.0 (ESI-)                                                                                                                                            |
| <b>Source Temp (<math>^{\circ}</math>C)</b>          | 150                                                                                                                                                               |
| <b>Desolvation Temp (<math>^{\circ}</math>C)</b>     | 500                                                                                                                                                               |
| <b>Desolvation Gas Flow (L/Hr)</b>                   | 1000                                                                                                                                                              |



**Table S3** The identified results of protease inhibitors in artificially aged silk samples treated by *Stenotrophomonas maltophilia*.

| Protein accession | Protein description              | Intensity |        |        |        |       |        |
|-------------------|----------------------------------|-----------|--------|--------|--------|-------|--------|
|                   |                                  | s_c       | s_5    | s_10   | s_15   | s_20  | s_25   |
| P81902            | Trypsin inhibitor                | 107580    | 0      | 0      | 45092  | 42834 | 50382  |
| H9IH32            | SERPIN domain-containing protein | 3662.8    | 4669.1 | 0      | 4114.1 | 0     | 0      |
| H9JH31            | SERPIN domain-containing protein | 396.27    | 0      | 0      | 404.68 | 0     | 664.67 |
| P80034            | ntichymotrypsin-2                | 1599.9    | 1303.9 | 1259.7 | 982.75 | 0     | 0      |
| Q6Q2D6            | Serpin-4A                        | 20451     | 0      | 0      | 0      | 0     | 0      |

**Table S4** The identified results of protease inhibitors in artificially aged silk samples treated by *Pseudomonas alcaligenes*.

| Protein accession | Protein description              | Intensity |        |        |        |        |        |
|-------------------|----------------------------------|-----------|--------|--------|--------|--------|--------|
|                   |                                  | s_c       | p_5    | p_10   | p_15   | p_20   | p_25   |
| P81902            | Trypsin inhibitor                | 39281     | 71929  | 0      | 0      | 47030  | 62048  |
| H9IH32            | SERPIN domain-containing protein | 3662.8    | 5610.1 | 5211.9 | 3440.3 | 4216.6 | 2936.1 |
| H9JH31            | SERPIN domain-containing protein | 123.29    | 295.34 | 320.9  | 0      | 212.99 | 263.5  |
| P80034            | Antichymotrypsin-2               | 1599.9    | 2541.5 | 2272.8 | 1426.4 | 1625.2 | 390.62 |
| Q6Q2D6            | Serpin-4A                        | 51717     | 0      | 0      | 0      | 0      | 0      |

**Table S5** Quantitative results of metabolites from SBC and SB.

| <b>Metabolites<br/>(nmol/g)</b>  | <b>SBC.Mean</b> | <b>SBC.SD</b>  | <b>SBC.Median</b> | <b>SB.Mean</b> | <b>SB.SD</b>  | <b>SB.Median</b> |
|----------------------------------|-----------------|----------------|-------------------|----------------|---------------|------------------|
| 2,3-<br>Diaminopropionic<br>acid | 44.7174         | 10.2107        | 39.3790           | 17.5068        | 4.2329        | 15.2926          |
| 5-Hydroxylysine                  | 2082.5134       | 368.4747       | 2016.5732         | 655.7800       | 325.80<br>97  | 677.5262         |
| Lysine                           | 2756.4441       | 923.2002       | 2942.1500         | 1488.9519      | 778.14<br>70  | 1381.2051        |
| Histidine                        | 1394.5483       | 493.3550       | 1525.6831         | 748.0042       | 363.11<br>98  | 609.8936         |
| Arginine                         | 2295.9378       | 1097.989<br>0  | 2015.1171         | 2179.9464      | 998.08<br>37  | 1761.8544        |
| Ornithine                        | 62233.7930      | 24828.18<br>40 | 52041.6610        | 15900.7664     | 7274.6<br>155 | 20092.8718       |
| Glutamine                        | 2009.1278       | 1109.221<br>1  | 1994.5151         | 948.4902       | 250.25<br>76  | 864.7132         |
| Glutamic acid                    | 6310.7495       | 1749.727<br>8  | 6644.2198         | 3578.6296      | 643.74<br>92  | 3290.0210        |
| Anserine                         | 34.1588         | 11.0182        | 32.2205           | 11.1438        | 3.7645        | 10.3998          |
| Carnosine                        | 224.0116        | 105.5393       | 211.3182          | 55.2329        | 20.493<br>2   | 50.8398          |
| Sarcosine                        | 1184.3924       | 588.7793       | 1152.9086         | 203.7064       | 80.950<br>5   | 198.7593         |
| beta-Alanine                     | 1796.9314       | 701.2569       | 1860.7262         | 517.3631       | 199.84<br>93  | 516.5003         |
| Alanine                          | 72920.0534      | 11624.37<br>30 | 77664.7060        | 33591.3802     | 7675.9<br>494 | 30953.9378       |
| Dimethylglycine                  | 22.2860         | 11.8777        | 19.9315           | 4.7438         | 1.6091        | 4.4739           |
| GABA                             | 909.7896        | 209.1986       | 1023.5038         | 335.1608       | 122.56<br>57  | 321.0583         |

---

|                         |            |               |            |           |               |           |
|-------------------------|------------|---------------|------------|-----------|---------------|-----------|
| Serine                  | 8589.6195  | 2989.478<br>0 | 8589.6057  | 3204.0619 | 900.59<br>93  | 3344.0685 |
| Threonine               | 4334.6170  | 1748.684<br>9 | 4043.4642  | 3240.0642 | 2230.4<br>064 | 2424.5312 |
| Homoserine              | 1016.2442  | 332.0701      | 1164.9264  | 398.8845  | 180.74<br>63  | 305.8763  |
| Creatine                | 1728.6011  | 552.5018      | 1842.5898  | 517.0288  | 186.44<br>46  | 528.8650  |
| Threonic acid           | 4.6635     | 0.5947        | 4.7867     | 1.1729    | 1.2383        | 0.9050    |
| Hydroxypropioni<br>acid | 812.5482   | 57.4027       | 780.6831   | 739.4430  | 205.36<br>76  | 694.6366  |
| Aminocaproic acid       | 194.5588   | 110.5917      | 194.6467   | 26.6219   | 17.687<br>6   | 20.2899   |
| Glycylproline           | 5981.9388  | 3344.599<br>3 | 5837.4338  | 987.2617  | 487.67<br>55  | 903.9106  |
| Homocitrulline          | 1410.0430  | 286.7255      | 1552.2824  | 523.8345  | 163.91<br>03  | 560.2202  |
| AMP                     | 7.9231     | 5.3085        | 10.4186    | 25.9357   | 11.489<br>8   | 20.8148   |
| GMP                     | 25.0263    | 11.1730       | 27.9350    | 54.7559   | 66.991<br>5   | 27.8315   |
| Lactic acid             | 609.8674   | 212.4672      | 580.3850   | 277.7379  | 182.07<br>76  | 203.4929  |
| Nicotinic acid          | 399.5107   | 153.4004      | 435.4463   | 321.6440  | 34.601<br>5   | 324.0805  |
| Methylcysteine          | 75.5132    | 26.6378       | 86.0076    | 23.0846   | 22.923<br>7   | 11.1821   |
| Gallic acid             | 37.6800    | 19.4303       | 39.5702    | 4.5416    | 5.2381        | 3.2412    |
| Tyrosine                | 11544.2156 | 4186.512<br>9 | 10638.2866 | 4113.2044 | 1208.3<br>119 | 4680.1585 |

---

|                                |            |               |            |           |               |           |
|--------------------------------|------------|---------------|------------|-----------|---------------|-----------|
| Asparagine                     | 2276.5472  | 1066.831<br>4 | 1905.4562  | 578.9532  | 164.43<br>80  | 648.1269  |
| Protocatechuic acid            | 14.0023    | 1.4005        | 14.5336    | 11.3263   | 2.5936        | 10.2034   |
| Phenylalanine                  | 8237.2874  | 1327.922<br>6 | 8356.3211  | 4752.6969 | 1221.1<br>195 | 5002.5584 |
| Hydroxyphenyllactic acid       | 35.1132    | 4.7325        | 35.5743    | 19.2341   | 3.6054        | 21.1810   |
| Glycyleucine                   | 1171.0241  | 738.8853      | 919.2617   | 195.3399  | 67.545<br>5   | 206.9621  |
| 3-Hydroxyhippuric acid         | 11.3517    | 3.1336        | 11.3680    | 5.2539    | 1.1224        | 4.6145    |
| 4-Hydroxyhippuric acid         | 123.1771   | 99.8359       | 90.1042    | 22.5823   | 15.145<br>5   | 22.8733   |
| Kynurenine                     | 68.8430    | 36.7246       | 48.2614    | 103.3860  | 48.614<br>6   | 118.6663  |
| 3-Nitrotyrosine                | 17.7607    | 4.5604        | 19.5373    | 9.1169    | 4.8017        | 9.3303    |
| Aspartic acid                  | 13780.0109 | 3895.709<br>3 | 13322.8898 | 7414.9440 | 2026.0<br>115 | 6783.5262 |
| Aminoadipic acid               | 187.2024   | 16.5411       | 188.3912   | 115.8899  | 37.344<br>1   | 126.4754  |
| Glucaric acid                  | 138.3316   | 42.4053       | 159.5280   | 47.4131   | 14.620<br>8   | 40.8276   |
| 2-Butenoic acid                | 433.1761   | 66.7436       | 465.3782   | 244.4979  | 98.581<br>4   | 201.0053  |
| Pyrrole-2-carboxylic acid      | 48.6810    | 22.0990       | 42.2525    | 18.1562   | 9.7051        | 17.6648   |
| 2-Hydroxy-3-methylbutyric acid | 144.8804   | 39.0004       | 145.5678   | 43.4398   | 19.179<br>1   | 53.2089   |
| 4-Hydroxybenzoic acid          | 195.1559   | 52.7548       | 192.9344   | 87.7522   | 23.804<br>4   | 89.1428   |

---

|                          |           |          |           |           |              |           |
|--------------------------|-----------|----------|-----------|-----------|--------------|-----------|
| Hippuric acid            | 3.0577    | 2.7193   | 3.1656    | 0.0101    | 0.0000       | 0.0101    |
| N-Acetyalanine           | 1271.4174 | 669.0737 | 1279.1215 | 327.3804  | 205.13<br>22 | 252.3425  |
| Malic acid               | 224.3754  | 46.4096  | 219.6020  | 120.5770  | 56.837<br>3  | 145.5641  |
| N-Acetyaspartic acid     | 937.9805  | 618.1603 | 856.9620  | 263.6100  | 88.985<br>1  | 248.1811  |
| N-Acetytyrosine          | 44.1100   | 16.4179  | 52.0817   | 16.2016   | 15.532<br>2  | 7.2465    |
| Ethylmethylacetic acid   | 4200.6775 | 831.4832 | 4349.4807 | 2474.1859 | 518.21<br>70 | 2701.2019 |
| 2-Methy-4-pentenoic acid | 64.2827   | 14.0136  | 57.5933   | 27.4365   | 11.342<br>6  | 25.8630   |
| Benzoic acid             | 5.8992    | 1.5294   | 6.1815    | 4.2862    | 7.1499       | 0.2889    |
| 2-Hydroxycaproic acid    | 1.1052    | 0.8802   | 1.4585    | 0.9446    | 1.1044       | 0.6600    |
| Phenylacetic acid        | 403.4469  | 48.9332  | 429.2161  | 361.2838  | 44.658<br>8  | 338.3095  |
| Indole-3-carboxylic acid | 2.0508    | 1.1784   | 1.4599    | 2.6638    | 0.4526       | 2.8365    |
| 4-Hydroxycinnamic acid   | 161.4275  | 4.2843   | 160.7168  | 132.2154  | 87.648<br>0  | 89.3690   |
| Indoleacetic acid        | 0.4955    | 0.1038   | 0.5153    | 0.3780    | 0.1692       | 0.3075    |
| Salicyluric acid         | 51.3783   | 9.8706   | 52.6146   | 24.7134   | 8.9476       | 27.0439   |
| Fumaric acid             | 57.7820   | 11.4095  | 57.2236   | 67.8220   | 17.466<br>1  | 63.7050   |
| Glutaric acid            | 25.5394   | 2.0083   | 25.0749   | 33.2102   | 10.816<br>5  | 39.3901   |

---

---

|                              |             |                 |             |                 |                 |             |
|------------------------------|-------------|-----------------|-------------|-----------------|-----------------|-------------|
| Aconitic acid                | 103.0389    | 20.3327         | 106.2247    | 118.7047        | 94.833<br>9     | 75.6011     |
| N-Acetyltryptophan           | 9.4482      | 1.8214          | 10.3843     | 3.3771          | 2.0853          | 2.3293      |
| Cinnamic acid                | 2.2113      | 1.0413          | 2.2457      | 0.9298          | 0.9419          | 0.5623      |
| N-Phenylacetylphenylalanine  | 4.3632      | 1.2123          | 4.5274      | 2.5122          | 2.1417          | 1.3293      |
| 4-Hydroxyphenylpyruvic acid  | 194320.9894 | 205873.2<br>667 | 82575.2925  | 273031.892<br>5 | 177957<br>.8177 | 183765.3919 |
| Azelaic acid                 | 17.6313     | 4.1183          | 19.0924     | 7.7497          | 2.5630          | 8.6725      |
| alpha-Ketoisovaleric acid    | 59.1992     | 74.0140         | 22.5638     | 107.5611        | 48.963<br>7     | 104.5143    |
| Ketoleucine                  | 1697.6400   | 1571.056<br>4   | 919.1456    | 3554.8710       | 1018.5<br>678   | 3535.6617   |
| 3-Methyl-2-oxopentanoic acid | 1246.5167   | 1394.228<br>1   | 543.1984    | 2376.9116       | 1208.2<br>890   | 2272.5101   |
| Phenylpyruvic acid           | 1112.6099   | 1132.058<br>3   | 487.8323    | 2160.5910       | 1368.4<br>768   | 1714.6904   |
| Methylmalonic acid           | 178.4083    | 117.6896        | 234.2502    | 90.4611         | 28.097<br>9     | 100.8357    |
| 2-Hydroxyglutaric acid       | 94.2845     | 65.1531         | 121.1529    | 16.2123         | 13.722<br>3     | 8.4848      |
| Glycine                      | 316750.6705 | 98419.51<br>03  | 284908.3365 | 163717.397<br>9 | 39096.<br>6421  | 178850.6612 |
| Guanidoacetic acid           | 233.6394    | 61.1913         | 227.6749    | 89.2939         | 35.431<br>6     | 97.6253     |
| Citrulline                   | 43950.9253  | 8605.395<br>5   | 47538.5615  | 16302.2364      | 8065.6<br>529   | 13826.2234  |
| Galactonic acid              | 223.4668    | 71.1602         | 215.7151    | 75.2328         | 31.204<br>4     | 79.3641     |

---

---

|                         |            |                |            |            |               |            |
|-------------------------|------------|----------------|------------|------------|---------------|------------|
| Gluconolactone          | 102.6204   | 24.8697        | 110.6949   | 58.9802    | 5.0262        | 57.2103    |
| Glycolic acid           | 363.6228   | 37.6860        | 378.7124   | 235.6665   | 62.302<br>9   | 229.5421   |
| alpha-Aminobutyric acid | 12729.8434 | 6166.108<br>8  | 9170.4774  | 4419.9554  | 1458.3<br>333 | 5215.5064  |
| Glyceric acid           | 95.2337    | 20.5707        | 101.0298   | 109.9259   | 50.443<br>0   | 100.5913   |
| Proline                 | 93276.7721 | 32957.05<br>50 | 97252.4363 | 31662.6081 | 7945.5<br>606 | 27199.4650 |
| Acetylglycine           | 3174.7697  | 2603.492<br>8  | 2052.1256  | 576.2677   | 310.01<br>82  | 541.5264   |
| Pipecolic acid          | 14.5945    | 1.6734         | 15.5311    | 8.4665     | 3.5452        | 7.8191     |
| Erythronic acid         | 16.1753    | 5.2782         | 14.5218    | 6.7040     | 2.3992        | 6.9150     |
| N-Acetylserine          | 132.4346   | 79.0095        | 87.2659    | 41.8143    | 23.177<br>8   | 35.4483    |
| Shikimic acid           | 2124.9655  | 575.9195       | 2001.7327  | 1073.4636  | 421.84<br>04  | 1022.9692  |
| N-Acetylglutamine       | 9.9892     | 2.8100         | 11.0409    | 7.7723     | 1.4067        | 7.5163     |
| Quinic acid             | 2.9785     | 0.7089         | 2.6496     | 0.4094     | 0.4593        | 0.2809     |
| Acetic acid             | 6550.7725  | 1658.812<br>8  | 6129.2802  | 4418.2455  | 2098.2<br>885 | 3315.0410  |
| Valine                  | 28502.2833 | 14640.89<br>68 | 20217.5903 | 8882.4590  | 3385.7<br>392 | 9390.3393  |
| Pyroglutamic acid       | 19167.4752 | 10875.18<br>17 | 13756.8429 | 6439.5870  | 2361.5<br>526 | 7627.0547  |
| 5-Aminolevulinic acid   | 1113.3293  | 816.5430       | 721.8582   | 259.3689   | 107.72<br>80  | 285.7057   |

---



---

|                            |            |                |            |           |               |           |
|----------------------------|------------|----------------|------------|-----------|---------------|-----------|
| Glucose                    | 178.7033   | 107.0575       | 200.6856   | 671.2170  | 902.16<br>09  | 299.5260  |
| 3,4-Dihydroxymandelic acid | 2.5880     | 0.9853         | 3.1343     | 1.4800    | 0.7440        | 1.5406    |
| Lactulose                  | 10.2962    | 4.3427         | 9.2572     | 6.0810    | 1.0160        | 5.8909    |
| Maltose/Lactose            | 22.9166    | 16.5943        | 24.0185    | 23.3868   | 16.425<br>7   | 21.6158   |
| Maltotriose                | 3.8630     | 1.5542         | 3.1968     | 9.7425    | 10.664<br>2   | 4.1164    |
| 3-Hydroxybutyric acid      | 642.6851   | 211.6522       | 555.8517   | 90.8338   | 19.715<br>5   | 85.7466   |
| Methionine                 | 16884.0153 | 4898.109<br>3  | 16942.7366 | 7492.0618 | 2034.2<br>883 | 7709.6521 |
| 4-Aminohippuric acid       | 26.7377    | 7.1754         | 26.9156    | 11.4788   | 4.6800        | 9.1963    |
| 2-Hydroxybutyric acid      | 201.1055   | 45.0491        | 225.8521   | 84.0270   | 36.521<br>9   | 71.6934   |
| 3-Hydroxyisovaleric acid   | 78.5232    | 25.9898        | 75.4823    | 53.0821   | 3.3467        | 54.7454   |
| Glutaconic acid            | 127.5151   | 62.2992        | 105.1261   | 48.3350   | 11.848<br>7   | 41.7112   |
| Isoleucine                 | 15211.7164 | 6260.092<br>6  | 12916.9671 | 5077.3245 | 1556.0<br>955 | 4181.1161 |
| Leucine                    | 27516.6091 | 11859.77<br>43 | 22871.5588 | 9905.2808 | 2532.7<br>633 | 8685.9032 |
| Xylose                     | 1262.1024  | 404.3926       | 1165.9963  | 3622.8342 | 1865.2<br>026 | 4183.2653 |
| Ribulose                   | 151.4726   | 53.3911        | 121.8932   | 105.2727  | 64.423<br>8   | 88.2052   |
| Xylulose                   | 104.1073   | 36.9626        | 87.4695    | 81.0090   | 51.946<br>1   | 67.4459   |

---

|                            |            |               |           |           |               |           |
|----------------------------|------------|---------------|-----------|-----------|---------------|-----------|
| Rhamnose                   | 7.8412     | 0.9667        | 7.8952    | 24.6299   | 38.975<br>1   | 2.2558    |
| beta-D-Fucose              | 86.5725    | 39.1493       | 73.5454   | 36.2609   | 7.4191        | 33.2771   |
| p-Hydroxymandelic acid     | 8.5486     | 1.1285        | 8.8812    | 6.5324    | 5.3920        | 3.8075    |
| Fructose                   | 5.8221     | 0.8879        | 5.8399    | 2.4622    | 1.0967        | 1.8748    |
| N-Acetyl-D-glucosamine     | 67.0186    | 44.4629       | 45.9709   | 84.4499   | 30.280<br>3   | 97.7697   |
| Propionic acid             | 10233.7165 | 2922.896<br>3 | 9955.0522 | 6150.0578 | 2569.9<br>654 | 5132.4003 |
| Glyceraldehyde             | 50.3986    | 59.9093       | 21.3736   | 56.5044   | 12.587<br>9   | 51.5444   |
| Norleucine                 | 78.8658    | 49.7306       | 62.9559   | 13.3035   | 4.5774        | 15.8490   |
| Homovanillic acid          | 21.3071    | 5.8811        | 22.8321   | 10.8602   | 3.3248        | 11.4853   |
| 2-Furoic acid              | 41.7426    | 7.9181        | 46.2782   | 23.2580   | 7.6655        | 26.4940   |
| p-Hydroxyphenylacetic acid | 26.8859    | 4.9876        | 24.6665   | 29.2299   | 11.778<br>7   | 23.4110   |
| Tryptophan                 | 1406.3315  | 403.669       | 1631.7428 | 648.9399  | 229.19        | 529.8226  |
| Butyric acid               | 230.7566   | 54.1338       | 256.9489  | 180.1910  | 68.649<br>5   | 155.9040  |
| Isobutyric acid            | 6069.4670  | 1373.623<br>4 | 6167.8363 | 4238.5145 | 1085.0<br>682 | 4500.7958 |
| Malonic acid               | 251.1170   | 78.2219       | 281.6208  | 84.8458   | 30.090<br>0   | 85.3085   |
| Tartaric acid              | 1.0106     | 0.2563        | 0.9596    | 0.8570    | 0.1289        | 0.7969    |

---

|                           |           |               |           |            |               |            |
|---------------------------|-----------|---------------|-----------|------------|---------------|------------|
| Isovaleric acid           | 4958.5304 | 1221.179<br>7 | 5000.7309 | 2905.0195  | 484.69<br>57  | 3128.2158  |
| Valeric acid              | 37.7597   | 7.1135        | 36.3913   | 24.3874    | 3.9176        | 22.8297    |
| N-<br>Methylnicotinamide  | 808.6118  | 237.8849      | 858.6994  | 559.9137   | 32.656<br>9   | 574.1470   |
| Phenyllactic acid         | 227.6778  | 81.3387       | 205.8026  | 112.7845   | 22.443<br>2   | 120.3587   |
| Oxalic acid               | 949.3080  | 322.1144      | 1027.4939 | 315.3309   | 136.50<br>34  | 287.0454   |
| Maleic acid               | 33.9924   | 16.6011       | 25.4287   | 10.7339    | 0.4499        | 10.8193    |
| Itaconic acid             | 6.7808    | 2.9000        | 8.1013    | 2.7110     | 1.1386        | 2.3983     |
| Methylsuccinic acid       | 28.7697   | 8.0823        | 31.4680   | 18.7274    | 3.9940        | 19.0632    |
| Adipic acid               | 8.5346    | 1.6449        | 8.9646    | 4.3328     | 2.9798        | 5.1890     |
| Phthalic acid             | 3.0503    | 0.8958        | 3.1537    | 0.6736     | 0.6275        | 0.6972     |
| Pimelic acid              | 5.2619    | 0.4313        | 5.1084    | 3.1084     | 1.4038        | 3.9060     |
| 3-Methylpentanoic<br>acid | 330.3148  | 65.8813       | 309.8093  | 386.7637   | 39.100<br>6   | 365.6329   |
| Isocaproic acid           | 24.1300   | 3.2307        | 23.5535   | 22.0009    | 2.3749        | 21.7726    |
| Caproic acid              | 11.1175   | 1.3937        | 10.9770   | 14.0377    | 6.8489        | 12.5970    |
| Acetoacetic acid          | 3897.9064 | 519.7653      | 3825.5922 | 26695.1198 | 7123.1<br>779 | 29397.7735 |
| Suberic acid              | 6.3883    | 2.3293        | 6.7090    | 2.9481     | 1.4462        | 3.3914     |

---

---

|                       |           |               |            |           |               |           |
|-----------------------|-----------|---------------|------------|-----------|---------------|-----------|
| TCA                   | 4.0067    | 1.0909        | 4.3783     | 1.3694    | 1.1084        | 1.8105    |
| Citric acid           | 394.2590  | 130.2043      | 462.4932   | 403.4287  | 200.26<br>41  | 406.5112  |
| Isocitric acid        | 69.4221   | 41.9240       | 68.4358    | 47.0964   | 19.033<br>3   | 55.7449   |
| 2-Methylhexanoic acid | 3.5224    | 0.9627        | 3.9000     | 4.6114    | 1.6938        | 3.8509    |
| 4-Methylhexanoic acid | 238.5843  | 40.8673       | 252.5885   | 133.1284  | 7.3756        | 133.8793  |
| Heptanoic acid        | 8.9414    | 1.3736        | 9.1706     | 9.6771    | 4.1822        | 7.9043    |
| Pyruvic acid          | 9236.0500 | 2907.271<br>6 | 10188.5285 | 8293.2698 | 5450.8<br>044 | 5912.5773 |
| 7-DHCA                | 0.3757    | 0.1682        | 0.2997     | 0.4055    | 0.2007        | 0.3669    |
| Oxoglutaric acid      | 3393.6961 | 2295.292<br>0 | 4298.3003  | 4520.7552 | 3167.5<br>824 | 4198.3453 |
| Octanoic acid         | 211.1409  | 207.4031      | 110.5482   | 374.2340  | 198.87<br>08  | 357.0808  |
| HDCA                  | 0.9469    | 0.4992        | 0.7447     | 0.4658    | 0.2716        | 0.4087    |
| CA                    | 3.0967    | 1.1911        | 3.1103     | 1.9334    | 1.0800        | 1.6709    |
| GCA                   | 4.9626    | 1.7037        | 4.9008     | 1.9279    | 1.1243        | 1.4832    |
| Nonanoic acid         | 6.8206    | 1.6102        | 6.4609     | 7.3742    | 8.0543        | 5.7875    |
| CDCA                  | 1.2866    | 0.2529        | 1.2936     | 1.3479    | 0.3363        | 1.2829    |
| Undecanoic acid       | 20.9250   | 2.6341        | 20.4240    | 29.6865   | 17.949<br>8   | 21.2128   |

---

---

|                             |            |                |            |            |                |            |
|-----------------------------|------------|----------------|------------|------------|----------------|------------|
| Tridecanoic acid            | 1.8251     | 1.0045         | 1.5394     | 1.7303     | 0.6292         | 1.4299     |
| Myristoleic acid            | 2.7163     | 0.9382         | 2.3147     | 2.6616     | 1.0122         | 2.5328     |
| 9E-tetradecenoic acid       | 0.6759     | 0.3784         | 0.5216     | 1.2925     | 0.3130         | 1.2062     |
| DCA                         | 2.4020     | 0.3219         | 2.3097     | 3.5914     | 3.7074         | 1.8970     |
| Myristic acid               | 120.5361   | 28.4170        | 123.6598   | 79.7744    | 34.299<br>4    | 97.9475    |
| 9-Pentadecenoic acid        | 187.5210   | 73.6546        | 160.9653   | 783.6602   | 1030.7<br>155  | 195.0930   |
| Pentadecanoic acid          | 4026.8127  | 1415.859<br>2  | 3224.6880  | 6652.0306  | 5805.5<br>097  | 3362.5381  |
| Palmitoleic acid            | 1209.7477  | 493.0141       | 1086.2510  | 3617.3775  | 4618.7<br>166  | 1003.5418  |
| Palmitelaidic acid          | 202.3578   | 87.6471        | 180.8196   | 541.8257   | 574.94<br>20   | 222.2791   |
| 10Z-Heptadecenoic acid      | 56.9678    | 23.1099        | 66.1641    | 31.7619    | 14.627<br>2    | 35.6416    |
| 10-Trans-Heptadecenoic acid | 521.0663   | 121.8311       | 569.2998   | 362.5016   | 139.61<br>19   | 362.8776   |
| Succinic acid               | 1220.0784  | 420.6128       | 1115.1773  | 1019.2801  | 204.81<br>54   | 1074.3884  |
| Citramalic acid             | 21.5125    | 8.7991         | 22.1778    | 6.6262     | 2.0943         | 5.9255     |
| Palmitic acid               | 29904.7297 | 11217.24<br>44 | 23900.4816 | 35244.5910 | 28572.<br>3824 | 21269.4118 |
| Heptadecanoic acid          | 909.3565   | 345.4606       | 734.4809   | 875.3596   | 583.69<br>00   | 590.1418   |
| Oleic acid                  | 4098.5812  | 1766.586<br>5  | 3411.5832  | 6955.5038  | 6628.0<br>059  | 4125.4999  |

---

---

|                       |            |                |            |           |               |           |
|-----------------------|------------|----------------|------------|-----------|---------------|-----------|
| Petroselinic acid     | 815.6806   | 79.4640        | 783.4228   | 1441.8956 | 1326.4<br>619 | 701.8258  |
| Stearic acid          | 3503.3672  | 908.7091       | 3200.2490  | 4138.3090 | 2072.9<br>166 | 3429.4428 |
| 10Z-Nonadecenoic acid | 41.2564    | 23.3204        | 30.1486    | 42.6312   | 37.641<br>6   | 22.9831   |
| Carnitine             | 485.4083   | 134.9897       | 541.2780   | 399.0911  | 216.53<br>41  | 285.0136  |
| Malonylcarnitine      | 0.5618     | 0.2714         | 0.4318     | 0.0658    | 0.0500        | 0.0872    |
| Glucose 6-phosphate   | 45.0123    | 37.1903        | 25.4217    | 26.6148   | 16.960<br>2   | 18.4558   |
| isoDCA                | 0.0896     | 0.0042         | 0.0909     | 0.0617    | 0.0462        | 0.0852    |
| Norvaline             | 19582.3262 | 10995.18<br>06 | 17777.3605 | 3874.1733 | 1546.3<br>819 | 4487.4072 |
| SAH                   | 1.4126     | 0.5887         | 1.1523     | 0.6475    | 0.2171        | 0.6003    |
| UCA                   | 0.0997     | 0.0754         | 0.1349     | 0.1155    | 0.0903        | 0.1493    |
| 12-KetoLCA            | 0.1783     | 0.0828         | 0.1809     | 0.5881    | 1.0148        | 0.0023    |
| TDHCA                 | 1.6470     | 1.8841         | 1.1984     | 0.6002    | 0.7649        | 0.3039    |
| N-Acetylhistidine     | 7.2858     | 5.9074         | 5.2698     | 1.1668    | 0.1465        | 1.0861    |
| Indolelactic acid     | 10.0564    | 1.7267         | 9.0917     | 5.0643    | 1.7979        | 5.1631    |
| Indole-3-pyruvic acid | 12.1309    | 10.5085        | 12.9405    | 135.1505  | 76.589<br>7   | 122.1839  |
| 1-Methylhistidine     | 45.3669    | 15.4742        | 44.0916    | 16.2423   | 5.5852        | 17.8131   |

---

---

|                            |            |               |            |           |               |           |
|----------------------------|------------|---------------|------------|-----------|---------------|-----------|
| 4-Hydroxyproline           | 16351.8261 | 4195.739<br>6 | 16937.0895 | 7127.0743 | 1698.1<br>004 | 6896.0153 |
| gamma-<br>Glutamylalanine  | 613.0626   | 57.0355       | 602.9926   | 311.1270  | 51.479<br>3   | 328.0270  |
| Imidazolepropionic<br>acid | 16.3139    | 5.8374        | 17.2508    | 5.1369    | 2.4744        | 5.2113    |

---

**Table S6** Quantitative results of metabolites from PBC and PB.

| <b>Metabolites<br/>(nmol/g)</b>  | <b>PBC.Mean</b> | <b>PBC.SD</b>  | <b>PBC.Median</b> | <b>PB.Mean</b> | <b>PB.SD</b>   | <b>PB.Median</b> |
|----------------------------------|-----------------|----------------|-------------------|----------------|----------------|------------------|
| 2,3-<br>Diaminopropionic<br>acid | 44.9810         | 4.7891         | 44.8523           | 15.6833        | 7.1161         | 12.1502          |
| 5-Hydroxylysine                  | 2887.5267       | 248.0942       | 2893.6985         | 932.6411       | 162.539<br>4   | 945.2218         |
| Lysine                           | 3826.0228       | 359.3471       | 3624.3513         | 2443.7484      | 945.818<br>4   | 2174.3100        |
| Histidine                        | 1440.7794       | 267.2662       | 1434.0178         | 1077.7022      | 686.147<br>4   | 988.5461         |
| Arginine                         | 3769.5877       | 677.2155       | 3750.4898         | 3041.6775      | 1870.05<br>33  | 2547.7085        |
| Ornithine                        | 90254.7029      | 12936.476<br>7 | 83927.1765        | 44489.8540     | 21196.9<br>086 | 54224.4127       |
| Glutamine                        | 3009.8983       | 779.0682       | 3408.9765         | 2725.3296      | 2321.84<br>37  | 1795.8629        |
| Glutamic acid                    | 6628.4310       | 1157.3685      | 6511.9568         | 3911.7752      | 940.979<br>6   | 4245.9178        |
| Anserine                         | 34.6059         | 2.2746         | 35.3203           | 13.5626        | 4.5922         | 14.8162          |
| Carnosine                        | 227.4759        | 6.6427         | 230.1294          | 80.5087        | 36.1246        | 97.3760          |
| Sarcosine                        | 1754.7050       | 373.3300       | 1769.8819         | 482.4335       | 308.882<br>6   | 503.0443         |
| beta-Alanine                     | 1852.0950       | 66.0315        | 1837.2619         | 661.5830       | 378.057<br>1   | 730.6800         |
| Alanine                          | 107651.0685     | 21638.467<br>1 | 112398.8309       | 61280.5857     | 21032.0<br>704 | 65432.1839       |
| Dimethylglycine                  | 21.3311         | 5.5167         | 20.0728           | 6.4195         | 4.0879         | 8.4149           |



---

|                       |            |                |            |            |                |            |
|-----------------------|------------|----------------|------------|------------|----------------|------------|
| GABA                  | 1294.2125  | 117.5328       | 1313.9492  | 565.4251   | 315.204<br>6   | 581.6728   |
| Serine                | 11792.7660 | 1262.6772      | 11193.6465 | 6684.5107  | 2797.08<br>48  | 7867.2391  |
| Threonine             | 52383.6522 | 10886.178<br>4 | 55385.6531 | 21049.0423 | 16417.0<br>460 | 26803.4525 |
| Homoserine            | 1743.1643  | 832.8769       | 1443.1575  | 816.5106   | 577.438<br>4   | 676.9907   |
| Creatine              | 2608.2498  | 325.4701       | 2772.3592  | 923.9328   | 557.674<br>6   | 940.9499   |
| Threonic acid         | 3.6447     | 0.9029         | 3.8136     | 0.5133     | 0.7323         | 0.0905     |
| Hydroxypropionic acid | 842.9999   | 14.3248        | 835.3291   | 651.6760   | 67.4573        | 644.2384   |
| Aminocaproic acid     | 123.9232   | 21.2097        | 118.0807   | 33.1429    | 11.0518        | 36.5822    |
| Glycylproline         | 6162.0315  | 1651.8503      | 5323.4138  | 1900.9292  | 869.692<br>1   | 2306.3109  |
| Homocitrulline        | 2609.1417  | 425.6328       | 2584.1086  | 994.5240   | 643.308<br>7   | 962.8221   |
| AMP                   | 20.1667    | 13.8298        | 25.4445    | 12.8542    | 6.1443         | 9.7347     |
| GMP                   | 151.1360   | 181.7746       | 84.4089    | 51.1921    | 65.4206        | 18.3953    |
| Lactic acid           | 752.2127   | 247.7768       | 620.2339   | 175.5967   | 124.375<br>5   | 157.1350   |
| Nicotinic acid        | 384.5311   | 40.1638        | 371.2354   | 180.1703   | 57.2276        | 183.7084   |
| Methylcysteine        | 189.0416   | 30.0126        | 198.4711   | 58.8641    | 35.3370        | 75.6002    |
| Gallic acid           | 11.7134    | 4.5654         | 12.9456    | 0.3046     | 0.3957         | 0.0762     |

---

---

|                                |            |           |            |           |               |           |
|--------------------------------|------------|-----------|------------|-----------|---------------|-----------|
| Tyrosine                       | 12996.0000 | 2300.7957 | 11789.0489 | 6758.8512 | 2517.36<br>98 | 7940.1267 |
| Asparagine                     | 3009.8072  | 599.0344  | 3317.8422  | 1465.7630 | 817.957<br>0  | 1525.2997 |
| Protocatechuic acid            | 12.0658    | 0.4671    | 12.0725    | 7.7848    | 0.5261        | 7.8268    |
| Phenylalanine                  | 11841.3135 | 1413.1752 | 11192.9316 | 7462.0186 | 3024.93<br>70 | 7986.6810 |
| Hydroxyphenyllactic acid       | 10.8144    | 2.1791    | 10.3887    | 9.2324    | 4.1331        | 7.0534    |
| Glycyleucine                   | 1206.8402  | 302.3966  | 1071.0820  | 482.3184  | 247.196<br>3  | 545.6814  |
| 3-Hydroxyhippuric acid         | 13.1497    | 2.2499    | 12.2069    | 6.6403    | 2.3918        | 5.5046    |
| 4-Hydroxyhippuric acid         | 117.9990   | 22.1527   | 105.7554   | 42.0075   | 10.4199       | 37.2624   |
| Kynurenine                     | 110.4247   | 44.4134   | 114.9595   | 89.8965   | 55.4625       | 61.7989   |
| 3-Nitrotyrosine                | 21.5771    | 1.7760    | 21.2545    | 11.4782   | 1.9325        | 10.9372   |
| Aspartic acid                  | 12668.3495 | 1747.0698 | 11670.1664 | 8698.9853 | 3425.96<br>12 | 8414.5821 |
| Aminoadipic acid               | 231.4329   | 34.3882   | 214.8309   | 128.5800  | 29.9276       | 137.6216  |
| Glucaric acid                  | 152.6646   | 14.9490   | 152.4390   | 62.7907   | 24.5617       | 57.1869   |
| 2-Butenoic acid                | 480.7889   | 40.4372   | 474.6756   | 253.1597  | 90.9562       | 261.5558  |
| Pyrrole-2-carboxylic acid      | 45.0296    | 4.6712    | 43.5133    | 21.3804   | 6.1273        | 24.6080   |
| 2-Hydroxy-3-methylbutyric acid | 74.3229    | 15.6254   | 82.9882    | 29.5207   | 12.6207       | 28.7778   |

---

---

|                                      |           |          |           |           |               |           |
|--------------------------------------|-----------|----------|-----------|-----------|---------------|-----------|
| 4-Hydroxybenzoic acid                | 228.6559  | 28.7761  | 222.5897  | 110.7344  | 46.4105       | 110.4547  |
| Hippuric acid                        | 3.8252    | 1.8020   | 2.9871    | 0.1569    | 0.1815        | 0.1008    |
| N-Acetyalanine                       | 1041.1975 | 102.5083 | 1014.2854 | 422.5658  | 183.115<br>0  | 331.7918  |
| Malic acid                           | 263.0655  | 40.6931  | 280.4085  | 129.2266  | 73.4846       | 102.5247  |
| N-Acetyaspartic acid                 | 626.9064  | 92.8908  | 627.6441  | 225.8350  | 116.022<br>1  | 207.6044  |
| N-Acetytyrosine                      | 54.4184   | 19.8410  | 55.1315   | 23.8352   | 9.6778        | 22.0925   |
| Ethylmethylacetic acid               | 6212.1551 | 513.6063 | 6112.5060 | 3105.8519 | 1276.83<br>91 | 2898.6407 |
| 2-Methy-4-pentenoic acid             | 91.2412   | 27.6616  | 95.6613   | 50.3622   | 26.6038       | 63.0818   |
| Benzoic acid                         | 7.8080    | 2.1919   | 6.9343    | 5.8825    | 3.9327        | 4.6382    |
| 2-Hydroxycaproic acid                | 3.2058    | 5.5346   | 0.0103    | 0.8703    | 1.4895        | 0.0103    |
| Phenylacetic acid                    | 469.7482  | 62.2164  | 448.9882  | 343.2888  | 37.4036       | 329.2167  |
| Indole-3-carboxylic acid             | 2.0636    | 0.5148   | 2.3390    | 2.6920    | 1.4252        | 2.3580    |
| Coumaric acid/4-Hydroxycinnamic acid | 182.7188  | 37.3244  | 178.3409  | 105.7829  | 5.9326        | 102.5125  |
| Indoleacetic acid                    | 0.3630    | 0.0534   | 0.3783    | 0.2827    | 0.0491        | 0.2907    |
| Salicyluric acid                     | 59.5879   | 8.4485   | 55.6732   | 25.8064   | 10.2602       | 27.3410   |
| Fumaric acid                         | 52.2550   | 10.1641  | 55.5603   | 39.9923   | 12.6322       | 35.1115   |

---

|                              |             |             |             |             |             |             |
|------------------------------|-------------|-------------|-------------|-------------|-------------|-------------|
| Glutaric acid                | 31.9347     | 6.9510      | 30.4597     | 21.7000     | 3.6898      | 21.7428     |
| Aconitic acid                | 150.1352    | 26.2838     | 163.6984    | 48.1995     | 15.9558     | 41.7692     |
| N-Acetyltryptophan           | 13.7072     | 1.8710      | 12.8850     | 4.3520      | 3.5155      | 3.2314      |
| Cinnamic acid                | 3.6329      | 0.7056      | 3.9034      | 0.7306      | 0.1298      | 0.6629      |
| N-Phenylacetylphenylalanine  | 5.5231      | 2.6970      | 4.5253      | 3.5143      | 2.2900      | 3.7971      |
| 4-Hydroxyphenylpyruvic acid  | 329356.7069 | 152957.2662 | 390070.7450 | 239878.8934 | 181607.9539 | 169949.9862 |
| Azelaic acid                 | 12.1008     | 1.6368      | 11.5938     | 8.3090      | 2.9259      | 9.8831      |
| alpha-Ketoisovaleric acid    | 98.5934     | 48.3514     | 115.9328    | 44.6882     | 40.7992     | 24.5118     |
| Ketoleucine                  | 2930.6200   | 1041.8531   | 3400.3621   | 2311.1623   | 1239.3270   | 1823.1850   |
| 3-Methyl-2-oxopentanoic acid | 2354.9764   | 1139.8673   | 2588.9974   | 1373.8851   | 1161.1720   | 741.5180    |
| Phenylpyruvic acid           | 1847.1763   | 840.8529    | 2282.5571   | 1625.5197   | 1064.6516   | 1088.0110   |
| Methylmalonic acid           | 68.1936     | 39.5385     | 49.5149     | 111.1375    | 62.9577     | 125.1326    |
| 2-Hydroxyglutaric acid       | 56.0644     | 30.5530     | 40.4616     | 49.0390     | 33.8456     | 41.9796     |
| Glycine                      | 303880.8327 | 50057.0403  | 296572.2045 | 202409.4361 | 40373.2942  | 223871.3750 |
| Guanidoacetic acid           | 216.4256    | 52.0634     | 217.9354    | 95.4238     | 33.0107     | 103.1866    |
| Citrulline                   | 3297.1661   | 275.7473    | 3218.1386   | 4842.3368   | 5314.0373   | 2066.2844   |

---

|                         |            |                |            |            |                |            |
|-------------------------|------------|----------------|------------|------------|----------------|------------|
| Galactonic acid         | 219.9844   | 56.0119        | 239.8608   | 83.5914    | 36.8333        | 86.3040    |
| Gluconolactone          | 162.7906   | 3.1930         | 162.9731   | 71.2999    | 42.0776        | 95.1275    |
| Glycolic acid           | 369.4625   | 18.3216        | 359.9970   | 248.7339   | 56.9306        | 246.5859   |
| alpha-Aminobutyric acid | 3510.4910  | 1221.3358      | 3999.1300  | 3197.5741  | 1618.20<br>40  | 2786.6725  |
| Glyceric acid           | 89.2533    | 2.9282         | 90.5296    | 53.5952    | 10.9350        | 54.2178    |
| Proline                 | 98801.6905 | 16651.044<br>8 | 89720.4784 | 50987.2104 | 16326.9<br>632 | 60361.9987 |
| Acetylglycine           | 2505.2291  | 710.0527       | 2650.0987  | 954.7136   | 283.082<br>4   | 1077.5250  |
| Pipecolic acid          | 14.7267    | 2.0481         | 13.7634    | 7.4922     | 2.4900         | 7.0211     |
| Erythronic acid         | 13.7018    | 1.0396         | 13.4916    | 6.7664     | 1.9338         | 7.0690     |
| N-Acetylserine          | 288.2584   | 85.3958        | 332.0764   | 148.6682   | 67.5187        | 167.9934   |
| Shikimic acid           | 2107.9847  | 57.0249        | 2131.0887  | 1037.9823  | 283.971<br>6   | 1103.1239  |
| N-Acetylglutamine       | 10.3462    | 2.3432         | 9.8370     | 7.3665     | 1.6361         | 6.6436     |
| Quinic acid             | 3.0435     | 1.3845         | 3.3971     | 0.6411     | 0.2518         | 0.6867     |
| Acetic acid             | 7266.8003  | 1117.7436      | 6967.2222  | 5240.0796  | 1064.69<br>06  | 5385.3217  |
| Valine                  | 26669.5982 | 5620.7137      | 27425.2625 | 14943.8997 | 5395.20<br>73  | 15856.4981 |
| Pyroglutamic acid       | 16389.4560 | 4707.3136      | 17888.2881 | 8059.9108  | 2941.63<br>69  | 8533.8562  |

---

---

|                            |            |           |            |            |               |            |
|----------------------------|------------|-----------|------------|------------|---------------|------------|
| 5-Aminolevulinic acid      | 883.9524   | 248.2277  | 984.9765   | 377.7559   | 106.242<br>5  | 400.2012   |
| Glucose                    | 459.2212   | 50.0155   | 441.4850   | 242.1905   | 154.378<br>8  | 306.0527   |
| 3,4-Dihydroxymandelic acid | 2.8173     | 0.9231    | 3.2504     | 1.1189     | 0.2287        | 1.0279     |
| Lactulose                  | 7.9939     | 0.5654    | 7.9306     | 8.9510     | 4.8943        | 6.6450     |
| Maltose/Lactose            | 8.3395     | 6.5564    | 5.7497     | 11.3169    | 6.2135        | 8.5680     |
| Maltotriose                | 1.0652     | 0.1776    | 0.9959     | 3.9044     | 3.7538        | 2.0968     |
| 3-Hydroxybutyric acid      | 1508.0222  | 134.0585  | 1455.2061  | 490.7638   | 265.316<br>2  | 559.6367   |
| Methionine                 | 18649.4124 | 2957.2076 | 17347.5054 | 10604.9477 | 3614.98<br>66 | 12607.4175 |
| 4-Aminohippuric acid       | 30.6659    | 4.1387    | 32.1588    | 8.9576     | 3.1936        | 10.1018    |
| 2-Hydroxybutyric acid      | 12.5110    | 3.1062    | 14.2444    | 19.2108    | 11.8862       | 20.1978    |
| 3-Hydroxyisovaleric acid   | 117.5395   | 13.6865   | 111.7605   | 53.5354    | 23.5118       | 58.5292    |
| Glutaconic acid            | 144.9321   | 27.0066   | 145.3841   | 72.0375    | 30.5615       | 72.2397    |
| Isoleucine                 | 16320.5152 | 2987.5947 | 15369.0972 | 10015.3436 | 4013.12<br>19 | 10790.8603 |
| Leucine                    | 27827.5919 | 4265.0074 | 26221.3497 | 17327.5781 | 6176.05<br>93 | 18179.4237 |
| Xylose                     | 733.7068   | 255.4362  | 728.7566   | 1810.4132  | 2004.39<br>34 | 678.1461   |
| Ribulose                   | 97.9933    | 7.7551    | 99.8635    | 69.5282    | 44.2155       | 75.6259    |

---

---

|                            |           |          |           |           |               |           |
|----------------------------|-----------|----------|-----------|-----------|---------------|-----------|
| Xylulose                   | 73.9499   | 4.3581   | 74.5181   | 52.3127   | 34.7473       | 53.7624   |
| Rhamnose                   | 2.7240    | 0.9219   | 2.9344    | 2.2983    | 1.3530        | 1.5239    |
| beta-D-Fucose              | 32.4031   | 5.0327   | 30.9320   | 16.0964   | 5.2111        | 16.7297   |
| p-Hydroxymandelic acid     | 10.5370   | 1.1202   | 9.9702    | 6.4288    | 2.3144        | 5.8820    |
| Fructose                   | 5.9587    | 1.5574   | 6.5740    | 3.9058    | 1.9700        | 4.4311    |
| N-Acetyl-D-glucosamine     | 62.2981   | 22.7241  | 68.3833   | 73.1775   | 22.4821       | 81.8232   |
| Propionic acid             | 7649.2378 | 869.0063 | 8146.5182 | 4975.4518 | 1306.50<br>39 | 5414.6560 |
| Glyceraldehyde             | 58.8024   | 46.9576  | 39.3598   | 26.9217   | 21.1756       | 18.9348   |
| Norleucine                 | 82.5292   | 18.7101  | 80.5677   | 35.9098   | 19.7754       | 43.2213   |
| Homovanillic acid          | 6.7178    | 0.6845   | 7.0291    | 4.5689    | 1.5668        | 4.5358    |
| 2-Furoic acid              | 49.4321   | 14.3063  | 55.0064   | 27.2786   | 5.5605        | 25.7343   |
| p-Hydroxyphenylacetic acid | 34.9060   | 6.7868   | 35.2155   | 21.2660   | 4.0406        | 20.6977   |
| Tryptophan                 | 1626.0112 | 52.1906  | 1596.5090 | 1031.7407 | 419.352<br>5  | 1091.5164 |
| Butyric acid               | 371.3146  | 18.9013  | 367.2191  | 187.3363  | 69.1889       | 205.2083  |
| Isobutyric acid            | 9740.6788 | 192.1841 | 9756.4038 | 5144.5707 | 2034.80<br>28 | 5065.7939 |
| Malonic acid               | 275.7630  | 1.1899   | 276.2008  | 96.1423   | 47.0636       | 108.7261  |

---

---

|                           |           |           |           |           |               |           |
|---------------------------|-----------|-----------|-----------|-----------|---------------|-----------|
| Tartaric acid             | 1.0293    | 0.1353    | 1.0979    | 0.8547    | 0.0847        | 0.9008    |
| Isovaleric acid           | 7478.2554 | 591.1430  | 7376.4645 | 3781.2215 | 1516.94<br>63 | 3613.2584 |
| Valeric acid              | 57.5321   | 5.9829    | 55.5993   | 29.6173   | 3.0848        | 29.2151   |
| N-<br>Methylnicotinamide  | 868.9630  | 248.3913  | 735.9557  | 517.9543  | 102.142<br>8  | 490.6925  |
| Phenyllactic acid         | 16.7011   | 5.0537    | 13.9185   | 31.4439   | 44.9364       | 8.9591    |
| Oxalic acid               | 1012.9648 | 258.4880  | 1095.9234 | 370.2605  | 155.681<br>8  | 452.8468  |
| Maleic acid               | 26.7164   | 7.4681    | 24.6905   | 10.5973   | 6.6289        | 11.6831   |
| Itaconic acid             | 12.0724   | 4.2476    | 13.4805   | 4.2822    | 2.7806        | 4.0726    |
| Methylsuccinic acid       | 35.1290   | 1.5943    | 35.0512   | 14.2744   | 5.6125        | 15.4080   |
| Adipic acid               | 6.2582    | 3.2130    | 6.6093    | 5.1915    | 1.6365        | 5.3817    |
| Phthalic acid             | 2.7339    | 0.5671    | 2.4572    | 1.2481    | 1.0075        | 1.0624    |
| Pimelic acid              | 5.5070    | 2.1316    | 4.5791    | 2.6438    | 0.4776        | 2.5426    |
| 3-Methylpentanoic<br>acid | 446.9077  | 30.4746   | 439.1407  | 464.8397  | 45.5950       | 440.9756  |
| Isocaproic acid           | 35.8668   | 2.6542    | 36.9906   | 20.3166   | 7.9182        | 22.6620   |
| Caproic acid              | 12.6951   | 2.7048    | 13.3728   | 13.7589   | 7.5249        | 15.6698   |
| Acetoacetic acid          | 4441.1573 | 1204.9962 | 4924.3724 | 7525.3832 | 5928.68<br>02 | 5165.9630 |

---



---

|                       |           |           |           |           |               |           |
|-----------------------|-----------|-----------|-----------|-----------|---------------|-----------|
| Suberic acid          | 4.4633    | 0.8909    | 4.8549    | 3.0488    | 0.7187        | 2.7181    |
| TCA                   | 5.9558    | 2.0695    | 5.1774    | 2.6902    | 1.4238        | 3.1899    |
| Citric acid           | 464.9040  | 72.9633   | 472.7691  | 197.5419  | 66.6992       | 194.8774  |
| Isocitric acid        | 74.1536   | 16.5215   | 68.6128   | 37.1655   | 29.7013       | 27.1728   |
| 2-Methylhexanoic acid | 4.5959    | 0.9801    | 4.4884    | 6.0627    | 1.9852        | 6.7982    |
| 4-Methylhexanoic acid | 349.7851  | 29.2846   | 357.4424  | 156.8001  | 77.8919       | 166.8576  |
| Heptanoic acid        | 9.2780    | 2.1921    | 9.6889    | 12.1926   | 5.9445        | 15.1921   |
| Pyruvic acid          | 7039.4097 | 550.6459  | 7251.7819 | 8130.0753 | 5638.68<br>28 | 5538.7119 |
| 7-DHCA                | 0.4201    | 0.0846    | 0.4403    | 0.2649    | 0.0383        | 0.2796    |
| Oxoglutaric acid      | 5732.6118 | 1035.2983 | 5699.3814 | 2674.4111 | 1539.71<br>22 | 2441.8461 |
| Octanoic acid         | 329.6017  | 150.4503  | 390.4774  | 234.1437  | 146.677<br>8  | 196.4680  |
| HDCA                  | 0.6990    | 0.1450    | 0.7279    | 0.1896    | 0.2373        | 0.1003    |
| CA                    | 4.4747    | 0.5447    | 4.5399    | 2.3528    | 0.9767        | 2.6398    |
| GCA                   | 3.9947    | 0.6592    | 3.9394    | 2.0113    | 0.6952        | 2.4016    |
| Nonanoic acid         | 6.9810    | 5.0702    | 4.7267    | 14.0097   | 13.0386       | 12.4703   |
| CDCA                  | 1.3092    | 0.7000    | 1.4182    | 0.9697    | 0.4520        | 1.2002    |

---

---

|                             |            |                |            |                 |                |             |
|-----------------------------|------------|----------------|------------|-----------------|----------------|-------------|
| Undecanoic acid             | 16.3534    | 0.9463         | 16.5978    | 34.0641         | 40.6035        | 15.0355     |
| Tridecanoic acid            | 1.3693     | 1.0027         | 1.1974     | 1.2233          | 0.5701         | 0.9534      |
| Myristoleic acid            | 4.3710     | 0.8968         | 4.8047     | 5.2717          | 2.0290         | 5.2989      |
| 9E-tetradecenoic acid       | 1.2605     | 0.4435         | 1.2616     | 1.7776          | 0.7029         | 1.5081      |
| DCA                         | 1.1157     | 0.4685         | 0.9340     | 1.8540          | 0.7845         | 2.0139      |
| Myristic acid               | 128.0423   | 86.2164        | 79.9281    | 114.6957        | 28.8827        | 123.8086    |
| 9-Pentadecenoic acid        | 221.2080   | 65.4916        | 197.7869   | 1097.8507       | 715.687<br>3   | 1402.1004   |
| Pentadecanoic acid          | 4051.5980  | 1311.9857      | 3989.0959  | 13257.4205      | 7340.47<br>08  | 16890.4091  |
| Palmitoleic acid            | 4472.8370  | 1134.6775      | 3931.0505  | 14897.7476      | 10537.7<br>980 | 20436.1042  |
| Palmitelaidic acid          | 209.1225   | 66.4982        | 171.6900   | 1033.3794       | 593.491<br>3   | 1197.2773   |
| 10Z-Heptadecenoic acid      | 94.0723    | 88.3639        | 45.5307    | 67.0498         | 23.1390        | 53.9397     |
| 10-Trans-Heptadecenoic acid | 629.0932   | 472.6595       | 361.8093   | 521.1831        | 93.4136        | 529.7012    |
| Succinic acid               | 916.9519   | 61.5123        | 923.4251   | 609.1365        | 235.949<br>9   | 473.2386    |
| Citramalic acid             | 42.9237    | 3.1688         | 43.4750    | 15.9836         | 9.0264         | 17.3678     |
| Palmitic acid               | 31509.7501 | 15965.013<br>1 | 30517.3334 | 111932.867<br>2 | 71036.9<br>783 | 137727.2460 |
| Heptadecanoic acid          | 840.2454   | 661.6766       | 565.1385   | 2557.2518       | 1908.34<br>38  | 2745.0138   |

---

---

|                       |            |           |            |            |                |            |
|-----------------------|------------|-----------|------------|------------|----------------|------------|
| Oleic acid            | 5763.7998  | 3547.3195 | 5751.1626  | 31376.7839 | 23942.4<br>884 | 43880.9221 |
| Petroselinic acid     | 348.4594   | 186.9691  | 273.4281   | 1883.9514  | 871.282<br>1   | 2228.0459  |
| Stearic acid          | 3435.9573  | 3040.6914 | 2142.5497  | 9464.2298  | 6369.89<br>53  | 10744.4740 |
| 10Z-Nonadecenoic acid | 39.9553    | 47.8699   | 20.4860    | 164.0015   | 133.256<br>5   | 212.7254   |
| Carnitine             | 180.4777   | 22.0128   | 172.0778   | 117.3755   | 58.7316        | 90.7263    |
| Malonylcarnitine      | 0.4527     | 0.2327    | 0.3857     | 0.1332     | 0.1081         | 0.1870     |
| Glucose 6-phosphate   | 35.4024    | 19.5720   | 39.9434    | 8.6857     | 3.6019         | 7.6735     |
| isoDCA                | 0.1200     | 0.0237    | 0.1235     | 0.2685     | 0.1583         | 0.3268     |
| Norvaline             | 19697.5142 | 6981.9458 | 18434.7485 | 7379.0137  | 3497.04<br>50  | 9190.5945  |
| SAH                   | 1.6435     | 0.8421    | 1.1610     | 0.7862     | 0.1783         | 0.8846     |
| UCA                   | 0.0960     | 0.0720    | 0.1315     | 0.1131     | 0.0880         | 0.1472     |
| 12-KetoLCA            | 0.3504     | 0.0366    | 0.3509     | 0.2200     | 0.3411         | 0.0234     |
| TDHCA                 | 3.7721     | 1.2504    | 3.8834     | 0.3701     | 0.3967         | 0.2777     |
| N-Acetylhistidine     | 5.6108     | 3.8795    | 3.7555     | 1.3681     | 0.4287         | 1.4817     |
| Indolelactic acid     | 0.2880     | 0.0000    | 0.2880     | 1.1715     | 1.5303         | 0.2880     |
| Indole-3-pyruvic acid | 20.9884    | 12.4140   | 15.3316    | 101.4898   | 91.1497        | 54.6694    |

---

---

|                            |            |           |            |            |               |            |
|----------------------------|------------|-----------|------------|------------|---------------|------------|
| 1-Methylhistidine          | 49.6160    | 2.9440    | 49.6993    | 21.7133    | 7.8764        | 25.3164    |
| 4-Hydroxyproline           | 22291.0138 | 2781.3963 | 22856.6283 | 10635.3101 | 4369.95<br>61 | 11275.0459 |
| gamma-<br>Glutamylalanine  | 717.6423   | 206.6229  | 691.5525   | 437.9356   | 196.345<br>9  | 448.6914   |
| Imidazolepropionic<br>acid | 25.0345    | 3.8140    | 26.1507    | 8.6308     | 5.7548        | 8.5836     |

---

**Table S7** Quantitative results of metabolites from historical silks.

| <b>Metabolites<br/>(nmol/g)</b> | <b>PBC.Mean</b> | <b>PBC.SD</b> | <b>PBC.Median</b> | <b>PB.Mean</b> | <b>PB.SD</b>         | <b>PB.Median</b> |
|---------------------------------|-----------------|---------------|-------------------|----------------|----------------------|------------------|
| Lysine                          | 840.5457        | 89.9065       | 853.9672          | 355.5816       | 111.733 <sub>8</sub> | 365.2712         |
| Arginine                        | 590.0138        | 150.6097      | 536.5507          | 266.4142       | 11.2378              | 266.3447         |
| Glutamine                       | 8.0262          | 3.7533        | 6.9031            | 5.0503         | 2.2849               | 6.2746           |
| Glutamic acid                   | 39.5054         | 6.4976        | 42.4229           | 20.1117        | 4.8173               | 19.8515          |
| Sarcosine                       | 3.7983          | 0.2209        | 3.8902            | 5.2238         | 1.7205               | 6.1796           |
| beta-Alanine                    | 7.2963          | 1.8712        | 7.1047            | 26.5645        | 4.8762               | 28.3357          |
| Alanine                         | 207.4349        | 34.9182       | 219.8111          | 341.8744       | 98.6153              | 363.2461         |
| Dimethylglycine                 | 1.0573          | 0.1067        | 1.0121            | 7.3462         | 2.3148               | 6.4966           |
| GABA                            | 33.9488         | 25.8582       | 25.1756           | 5.2417         | 1.0889               | 5.5109           |
| Serine                          | 58.8162         | 18.5358       | 52.5318           | 47.7661        | 19.9228              | 58.1603          |
| Threonine                       | 14.9733         | 3.8631        | 16.8553           | 10.6633        | 4.6294               | 8.2280           |
| Homoserine                      | 5.7027          | 0.3939        | 5.5873            | 4.6569         | 1.1237               | 4.3783           |
| Creatine                        | 3.3591          | 0.6678        | 3.2686            | 3.4946         | 0.4517               | 3.3673           |
| Aminocaproic acid               | 0.9365          | 0.1900        | 0.8745            | 1.8852         | 0.4319               | 2.0301           |
| Glycylproline                   | 0.7982          | 0.0406        | 0.8099            | 1.4627         | 0.2227               | 1.5615           |

---

|                                         |          |         |          |          |              |           |
|-----------------------------------------|----------|---------|----------|----------|--------------|-----------|
| AMP                                     | 0.5367   | 0.1141  | 0.4730   | 0.3926   | 0.0285       | 0.3776    |
| Lactic acid                             | 345.5019 | 97.8659 | 349.8616 | 931.3452 | 422.994<br>5 | 1028.9239 |
| Nicotinic acid                          | 12.6814  | 6.7760  | 13.3370  | 2.6368   | 0.4652       | 2.5907    |
| Tyrosine                                | 21.6322  | 5.7708  | 20.9955  | 18.4335  | 2.6726       | 19.4734   |
| 3,4-<br>Dihydroxyhydrocinn<br>amic acid | 0.6987   | 0.0333  | 0.6974   | 0.8976   | 0.0640       | 0.8756    |
| Asparagine                              | 7.8813   | 2.3374  | 7.2739   | 9.0721   | 1.1791       | 9.2391    |
| Protocatechuic acid                     | 57.0373  | 14.2389 | 51.1436  | 58.0681  | 8.1624       | 57.6292   |
| Phenylalanine                           | 8.4345   | 4.6062  | 6.9398   | 1.2336   | 0.9417       | 0.7332    |
| Hydroxyphenyllactic<br>acid             | 2.4413   | 0.2434  | 2.5462   | 0.3621   | 0.1491       | 0.3301    |
| Glycylleucine                           | 1.5984   | 0.4139  | 1.7173   | 0.4834   | 0.1020       | 0.4329    |
| 3-Hydroxyhippuric<br>acid               | 8.5158   | 1.1593  | 8.0844   | 17.7868  | 3.7209       | 19.5215   |
| Kynurenine                              | 0.1626   | 0.2112  | 0.0407   | 0.0407   | 0.0000       | 0.0407    |
| 3-Nitrotyrosine                         | 2.8610   | 0.6795  | 3.1206   | 1.2225   | 0.3290       | 1.2168    |
| Aspartic acid                           | 39.1686  | 7.5764  | 43.5317  | 22.4077  | 10.7168      | 23.9300   |
| Aminoadipic acid                        | 5.2391   | 1.4561  | 5.1874   | 0.6443   | 0.9950       | 0.1288    |
| 2-Butenoic acid                         | 6.8126   | 1.9351  | 7.0603   | 4.4328   | 0.0967       | 4.4099    |

---

---

|                                      |          |         |          |          |         |          |
|--------------------------------------|----------|---------|----------|----------|---------|----------|
| Pyrrole-2-carboxylic acid            | 0.8540   | 0.1110  | 0.9086   | 0.7348   | 0.1510  | 0.7580   |
| 2-Hydroxy-3-methylbutyric acid       | 2.3110   | 0.7946  | 2.4916   | 1.9909   | 0.4248  | 2.1351   |
| 4-Hydroxybenzoic acid                | 121.1071 | 11.4885 | 127.6080 | 374.8168 | 45.2682 | 382.0971 |
| ortho-Hydroxyphenylacetic acid       | 0.3958   | 0.0738  | 0.3745   | 0.7298   | 0.0280  | 0.7421   |
| Hippuric acid                        | 0.3502   | 0.0430  | 0.3497   | 0.5102   | 0.0894  | 0.5293   |
| N-Acetyalanine                       | 10.4880  | 1.0695  | 10.3069  | 9.7831   | 1.8823  | 9.7390   |
| Malic acid                           | 40.0733  | 13.4747 | 37.7158  | 47.9096  | 16.7993 | 52.8840  |
| N-Acetyaspartic acid                 | 2.2126   | 0.1148  | 2.2354   | 2.6704   | 0.1671  | 2.5853   |
| Ethylmethylacetic acid               | 5.8683   | 2.6262  | 4.4405   | 7.9919   | 2.1133  | 8.4871   |
| Benzoic acid                         | 42.1703  | 5.9447  | 40.2984  | 121.1190 | 27.5915 | 132.7391 |
| 2-Hydroxycaproic acid                | 2.5634   | 0.2438  | 2.6981   | 2.4990   | 0.9784  | 3.0018   |
| Phenylacetic acid                    | 20.1593  | 3.0915  | 20.1533  | 63.8892  | 10.6126 | 67.3813  |
| Indole-3-carboxylic acid             | 3.3748   | 0.6567  | 3.0978   | 5.0120   | 1.1070  | 5.4459   |
| Coumaric acid/4-Hydroxycinnamic acid | 0.2062   | 0.0284  | 0.2164   | 0.1545   | 0.0846  | 0.1269   |
| Indoleacetic acid                    | 0.0113   | 0.0079  | 0.0089   | 0.0209   | 0.0104  | 0.0214   |
| Fumaric acid                         | 3.1215   | 0.2722  | 3.1370   | 3.3183   | 0.2002  | 3.4201   |

---

---

|                              |          |         |          |          |         |          |
|------------------------------|----------|---------|----------|----------|---------|----------|
| Glutaric acid                | 8.6134   | 0.4252  | 8.7730   | 25.3177  | 3.7887  | 25.5817  |
| Aconitic acid                | 1.6002   | 0.3691  | 1.6658   | 1.3045   | 0.3170  | 1.3732   |
| Cinnamic acid                | 0.4480   | 0.1165  | 0.4842   | 1.0155   | 0.1594  | 1.0200   |
| 2-Phenylpropionate           | 0.3336   | 0.0458  | 0.3379   | 1.2559   | 0.1884  | 1.1743   |
| Hydrocinnamic acid           | 0.3706   | 0.0629  | 0.3350   | 2.4734   | 0.3385  | 2.3281   |
| Benzenebutanoic acid         | 0.3119   | 0.0345  | 0.3098   | 0.5860   | 0.0650  | 0.5959   |
| Azelaic acid                 | 43.3844  | 15.3928 | 34.9550  | 43.1574  | 6.7263  | 44.3876  |
| Sebacic acid                 | 4.1302   | 0.7892  | 4.0100   | 5.1861   | 0.5504  | 5.2309   |
| alpha-Ketoisovaleric acid    | 4.4569   | 0.4187  | 4.2630   | 5.8274   | 1.4236  | 6.2794   |
| Ketoleucine                  | 2.2613   | 0.5116  | 2.0519   | 2.5756   | 0.2540  | 2.5084   |
| 3-Methyl-2-oxopentanoic acid | 1.5857   | 0.0989  | 1.6362   | 2.6535   | 0.5295  | 2.7630   |
| Phenylpyruvic acid           | 1.5474   | 0.2535  | 1.4500   | 2.1841   | 0.4184  | 2.1497   |
| Methylmalonic acid           | 12.3469  | 1.3315  | 11.9759  | 43.2694  | 5.0661  | 46.0563  |
| 2-Hydroxyglutaric acid       | 18.2193  | 2.0125  | 18.3778  | 10.7995  | 1.1271  | 10.6225  |
| Glycine                      | 196.1454 | 53.2456 | 193.0621 | 248.6763 | 12.7706 | 247.0242 |
| Glycolic acid                | 136.6011 | 4.4007  | 136.6066 | 327.9409 | 97.9811 | 378.7902 |

---



---

|                          |           |          |           |           |              |           |
|--------------------------|-----------|----------|-----------|-----------|--------------|-----------|
| alpha-Aminobutyric acid  | 68.8593   | 2.4821   | 69.9028   | 314.7991  | 75.6066      | 282.2889  |
| Glyceric acid            | 18.3724   | 6.1715   | 21.2515   | 45.5272   | 7.3429       | 42.0612   |
| Proline                  | 18.9069   | 8.0457   | 14.9485   | 16.2886   | 4.5202       | 16.2415   |
| Acetylglycine            | 5.7383    | 1.3471   | 5.7145    | 12.1549   | 3.8489       | 13.7379   |
| Pipecolic acid           | 0.4738    | 0.1656   | 0.4401    | 0.2727    | 0.1246       | 0.2448    |
| Erythronic acid          | 3.4789    | 1.5501   | 3.3773    | 1.1511    | 0.3156       | 1.2212    |
| N-Acetylserine           | 2.8686    | 0.6041   | 3.0527    | 2.6279    | 1.0313       | 2.7005    |
| Acetic acid              | 2471.0407 | 494.8492 | 2420.1847 | 1675.8626 | 281.074<br>5 | 1767.4816 |
| Valine                   | 799.9822  | 113.0256 | 862.0295  | 3070.9525 | 678.116<br>7 | 3119.7484 |
| Pyroglutamic acid        | 35.1581   | 7.9007   | 33.0106   | 19.3561   | 6.4871       | 20.0982   |
| 5-Aminolevulinic acid    | 2.8561    | 0.5602   | 3.0489    | 5.4827    | 1.7293       | 5.9082    |
| Glucose                  | 472.2886  | 226.9162 | 424.9339  | 40.4443   | 4.2463       | 40.3156   |
| 3-Hydroxybutyric acid    | 15.5160   | 4.2377   | 15.7357   | 9.7379    | 2.2891       | 9.8910    |
| Methionine               | 0.6885    | 0.5513   | 0.8233    | 2.8326    | 0.7211       | 3.1108    |
| 2-Hydroxybutyric acid    | 4.7516    | 0.6444   | 4.8418    | 2.9141    | 0.9832       | 3.3264    |
| 3-Hydroxyisovaleric acid | 9.4560    | 1.9501   | 9.0610    | 7.7302    | 1.4104       | 7.0653    |

---

---

|                            |          |         |          |          |         |          |
|----------------------------|----------|---------|----------|----------|---------|----------|
| Glutaconic acid            | 7.4730   | 0.5696  | 7.4648   | 10.7109  | 4.7125  | 12.6493  |
| Isoleucine                 | 9.8712   | 3.0360  | 10.2730  | 4.5382   | 3.3652  | 3.3294   |
| Leucine                    | 10.5126  | 12.2474 | 4.0511   | 0.7145   | 0.7171  | 0.6022   |
| Xylose                     | 19.5701  | 15.6873 | 13.8191  | 1.2973   | 1.6853  | 0.3243   |
| Ribulose                   | 1.3167   | 0.1176  | 1.3822   | 1.3505   | 0.0834  | 1.3815   |
| Xylulose                   | 0.1666   | 0.2589  | 0.0171   | 0.1207   | 0.0897  | 0.1710   |
| p-Hydroxymandelic acid     | 0.1484   | 0.1250  | 0.1972   | 0.1505   | 0.0777  | 0.1751   |
| Fructose                   | 6.2003   | 4.2755  | 4.2529   | 0.9713   | 1.2049  | 0.3064   |
| Propionic acid             | 137.5511 | 25.8000 | 128.2076 | 111.5614 | 15.9000 | 118.5661 |
| Homovanillic acid          | 0.2459   | 0.0456  | 0.2260   | 0.2007   | 0.0649  | 0.1734   |
| 2-Furoic acid              | 100.1447 | 4.1516  | 101.4819 | 1.3548   | 0.4914  | 1.2990   |
| p-Hydroxyphenylacetic acid | 0.0343   | 0.0000  | 0.0343   | 0.1372   | 0.1782  | 0.0343   |
| Tryptophan                 | 2.5049   | 0.5085  | 2.7662   | 2.2501   | 0.3440  | 2.3145   |
| Butyric acid               | 29.5813  | 6.8142  | 26.8393  | 22.8924  | 1.0136  | 22.4258  |
| Isobutyric acid            | 24.7332  | 2.5693  | 24.1988  | 32.8863  | 1.1827  | 32.5584  |
| Mandelic acid              | 1.2429   | 0.1375  | 1.1977   | 1.7080   | 0.2117  | 1.7874   |

---

---

|                           |          |         |          |           |                     |           |
|---------------------------|----------|---------|----------|-----------|---------------------|-----------|
| Malonic acid              | 25.7038  | 5.9556  | 28.2859  | 42.3194   | 11.2924             | 47.7552   |
| Valeric acid              | 81.7758  | 12.1736 | 76.6440  | 90.4411   | 17.2306             | 93.9982   |
| N-<br>Methylnicotinamide  | 16.6607  | 1.5715  | 16.6130  | 54.6899   | 14.9449             | 58.3452   |
| Phenyllactic acid         | 0.2624   | 0.0874  | 0.3057   | 0.2897    | 0.0729              | 0.2854    |
| Oxalic acid               | 257.8487 | 51.8155 | 265.6078 | 1237.6994 | $\frac{114.304}{3}$ | 1217.9829 |
| Maleic acid               | 2.5789   | 0.4355  | 2.3961   | 2.3007    | 0.6436              | 2.5276    |
| Itaconic acid             | 2.9469   | 0.1375  | 2.8738   | 15.8646   | 2.8529              | 15.8444   |
| Citraconic acid           | 0.1746   | 0.0739  | 0.1397   | 0.2210    | 0.0275              | 0.2319    |
| Methylsuccinic acid       | 7.5965   | 0.2827  | 7.5320   | 24.3750   | 4.1062              | 25.7826   |
| Adipic acid               | 16.8263  | 5.5798  | 14.4309  | 19.7575   | 3.8418              | 17.8212   |
| Methylglutaric acid       | 0.6973   | 0.1790  | 0.6965   | 1.3030    | 0.2819              | 1.2751    |
| Phthalic acid             | 9.8660   | 1.9196  | 9.9788   | 19.6815   | 2.9374              | 20.8968   |
| Pimelic acid              | 5.4390   | 1.7651  | 4.4389   | 8.4057    | 0.8446              | 8.4158    |
| 3-Methyladipic acid       | 0.3398   | 0.0844  | 0.3770   | 0.6991    | 0.0736              | 0.6821    |
| 2-Methylpentanoic<br>acid | 1.1307   | 0.2410  | 1.1117   | 0.9641    | 0.3498              | 1.0869    |
| Caproic acid              | 130.5495 | 9.4931  | 128.4203 | 155.3902  | 24.0475             | 154.1939  |

---

---

|                     |          |         |          |           |                     |           |
|---------------------|----------|---------|----------|-----------|---------------------|-----------|
| Suberic acid        | 15.4022  | 4.8730  | 12.7874  | 16.1139   | 1.8219              | 15.4560   |
| Citric acid         | 6.6844   | 3.7333  | 7.4214   | 2.1453    | 0.6844              | 2.0342    |
| Isocitric acid      | 6.8820   | 2.6705  | 7.4425   | 15.5925   | 10.7925             | 18.3873   |
| Heptanoic acid      | 39.0806  | 0.9047  | 38.8370  | 78.7891   | 10.2189             | 73.0046   |
| Pyruvic acid        | 28.4838  | 8.0004  | 27.0030  | 92.4203   | 19.1328             | 101.4625  |
| 7-DHCA              | 0.0534   | 0.0169  | 0.0477   | 0.1062    | 0.0390              | 0.1255    |
| Oxoglutaric acid    | 0.8897   | 0.1408  | 0.9422   | 0.8107    | 0.1326              | 0.7474    |
| Octanoic acid       | 374.2079 | 26.7644 | 367.8052 | 1572.8603 | $\frac{261.944}{6}$ | 1540.4905 |
| CA                  | 0.0732   | 0.0079  | 0.0722   | 0.5483    | 0.3786              | 0.4363    |
| Oxoadipic acid      | 0.1613   | 0.0333  | 0.1503   | 0.1294    | 0.0327              | 0.1287    |
| Decanoic acid       | 71.6732  | 9.9429  | 73.5303  | 247.0517  | 72.2059             | 284.0712  |
| Undecylenic acid    | 0.5784   | 0.1600  | 0.4926   | 1.8303    | 0.4784              | 1.8296    |
| Undecanoic acid     | 8.1232   | 0.4016  | 8.1171   | 32.5022   | 10.5995             | 35.6467   |
| 12-Tridecenoic acid | 0.6125   | 0.1577  | 0.5694   | 1.0419    | 0.3286              | 1.1545    |
| Tridecanoic acid    | 8.3518   | 0.9763  | 8.5712   | 23.9526   | 8.1451              | 28.4287   |
| Myristoleic acid    | 1.2336   | 0.1253  | 1.2115   | 0.6549    | 0.1214              | 0.5954    |

---

---

|                             |          |          |          |          |         |          |
|-----------------------------|----------|----------|----------|----------|---------|----------|
| 9E-tetradecenoic acid       | 14.1193  | 2.6819   | 13.0402  | 8.6114   | 1.9678  | 9.1239   |
| Ricinoleic acid             | 8.5244   | 2.9349   | 7.6003   | 7.0110   | 1.0349  | 6.8852   |
| 12-Hydroxystearic acid      | 10.3483  | 1.0583   | 9.8647   | 35.5664  | 7.2759  | 38.9688  |
| LCA                         | 0.0848   | 0.0208   | 0.0928   | 0.2502   | 0.0005  | 0.2501   |
| Myristic acid               | 60.5795  | 4.7811   | 63.0768  | 100.6692 | 17.7141 | 98.0281  |
| 9-Pentadecenoic acid        | 0.8124   | 0.3714   | 0.6001   | 0.8320   | 0.1523  | 0.8251   |
| Pentadecanoic acid          | 40.1484  | 3.2302   | 41.7262  | 36.7921  | 4.3295  | 37.2626  |
| Palmitoleic acid            | 26.5564  | 5.6928   | 25.0864  | 22.6481  | 6.6459  | 23.3681  |
| Palmitelaidic acid          | 10.4796  | 2.2781   | 11.3789  | 12.2936  | 1.9637  | 12.1950  |
| 10Z-Heptadecenoic acid      | 3.2613   | 0.1873   | 3.3132   | 1.2384   | 0.1263  | 1.2560   |
| 10-Trans-Heptadecenoic acid | 3.8269   | 0.3416   | 3.7613   | 1.4034   | 0.1913  | 1.4968   |
| alpha-Linolenic acid        | 9.9163   | 3.9188   | 11.0975  | 0.4693   | 0.0488  | 0.4927   |
| Linoleic acid               | 764.6751 | 273.4748 | 901.3633 | 44.9380  | 6.9654  | 45.0431  |
| Succinic acid               | 36.2940  | 1.8281   | 36.2960  | 142.0175 | 26.1326 | 156.3370 |
| Citramalic acid             | 2.0524   | 0.3284   | 1.9415   | 15.4969  | 10.2712 | 14.9492  |
| 10Z-Nonadecenoic acid       | 0.4631   | 0.0978   | 0.4211   | 0.3250   | 0.0351  | 0.3435   |

---

---

|                              |         |         |         |         |        |         |
|------------------------------|---------|---------|---------|---------|--------|---------|
| Carnitine                    | 23.6679 | 12.2061 | 20.3266 | 0.1971  | 0.2580 | 0.0910  |
| Acetylcarnitine              | 0.5431  | 0.0269  | 0.5532  | 0.4082  | 0.0417 | 0.3870  |
| Propionylcarnitine           | 0.0188  | 0.0037  | 0.0195  | 0.0090  | 0.0002 | 0.0089  |
| Butyrylcarnitine             | 0.0232  | 0.0081  | 0.0258  | 0.0149  | 0.0009 | 0.0154  |
| 2-Methylbutyrylcarnitine     | 0.1157  | 0.0000  | 0.1157  | 0.1157  | 0.0000 | 0.1157  |
| Valerylcarnitine             | 0.0184  | 0.0021  | 0.0178  | 0.0118  | 0.0011 | 0.0116  |
| Isovalerylcarnitine          | 0.0204  | 0.0070  | 0.0180  | 0.0141  | 0.0030 | 0.0139  |
| 3-Hydroxyisovalerylcarnitine | 0.0182  | 0.0009  | 0.0178  | 0.0078  | 0.0005 | 0.0078  |
| Norvaline                    | 15.1742 | 6.5058  | 14.8158 | 12.9332 | 3.5247 | 11.6003 |
| 2,2-Dimethyladipic acid      | 1.9418  | 0.1783  | 2.0421  | 7.0244  | 1.0874 | 7.6051  |
| 12-KetoLCA                   | 0.2805  | 0.0304  | 0.2669  | 0.2949  | 0.0395 | 0.2915  |
| Indole-3-carboxaldehyde      | 3.4700  | 0.5369  | 3.7407  | 7.8236  | 1.0746 | 7.9217  |
| 2,2-Dimethylsuccinic acid    | 0.3451  | 0.2506  | 0.4763  | 1.0649  | 0.3642 | 1.1852  |
| Indolelactic acid            | 0.2401  | 0.0383  | 0.2511  | 0.0674  | 0.0101 | 0.0672  |
| 6,7-DiketoLCA                | 1.6753  | 0.1453  | 1.6165  | 1.3879  | 0.5081 | 1.1438  |
| gamma-Glutamylalanine        | 0.8946  | 0.2681  | 0.8989  | 1.1696  | 0.1484 | 1.1710  |

---

---

|                          |          |         |          |          |              |          |
|--------------------------|----------|---------|----------|----------|--------------|----------|
| Imidazolepropionic acid  | 0.2435   | 0.0383  | 0.2335   | 0.2929   | 0.1471       | 0.2844   |
| Threonic acid            | 2.7290   | 1.2275  | 3.0609   | 1.1490   | 0.3300       | 0.9769   |
| N-Acetylserotonin        | 0.2420   | 0.0931  | 0.2248   | 0.4362   | 0.1066       | 0.3937   |
| Hydroxypropionic acid    | 228.8697 | 42.7884 | 208.2183 | 545.5593 | 129.216<br>5 | 612.8025 |
| Gallic acid              | 2.5287   | 0.3007  | 2.4467   | 2.8344   | 0.4912       | 2.9818   |
| 3-Chlorotyrosine         | 8.9110   | 2.0905  | 8.0354   | 12.4332  | 2.1424       | 12.3150  |
| Glucaric acid            | 0.8308   | 0.2024  | 0.8687   | 0.6786   | 0.1826       | 0.7702   |
| 2-Methy-4-pentenoic acid | 0.9579   | 0.1255  | 0.9605   | 0.9348   | 0.3437       | 0.9942   |
| Indoleacrylic acid       | 0.6750   | 0.1869  | 0.5881   | 0.5393   | 0.1283       | 0.5565   |
| Indole-3-propionic acid  | 0.1231   | 0.0068  | 0.1248   | 0.1153   | 0.0077       | 0.1114   |
| Maltose/Lactose          | 11.6949  | 4.8784  | 12.9112  | 0.4263   | 0.2568       | 0.4359   |
| Glyceraldehyde           | 1.0180   | 1.2745  | 0.5373   | 21.6926  | 6.0671       | 24.5383  |
| Norleucine               | 0.0529   | 0.0000  | 0.0529   | 0.0529   | 0.0000       | 0.0529   |
| 3-Phenylbutyric acid     | 0.0722   | 0.0299  | 0.0736   | 0.3346   | 0.1924       | 0.2703   |
| 4-Methylhexanoic acid    | 1.6779   | 0.1312  | 1.6835   | 1.3899   | 0.0433       | 1.3681   |
| 5Z-Dodecenoic acid       | 0.2384   | 0.0200  | 0.2494   | 0.4422   | 0.0555       | 0.4511   |

---

---

|                        |          |         |          |          |         |         |
|------------------------|----------|---------|----------|----------|---------|---------|
| Oleic acid             | 271.0330 | 39.7211 | 289.2895 | 100.7552 | 15.3574 | 99.8043 |
| Hexanoylcarnitine      | 0.0182   | 0.0066  | 0.0147   | 0.0037   | 0.0004  | 0.0039  |
| Octanoylcarnitine      | 0.0173   | 0.0031  | 0.0170   | 0.0042   | 0.0003  | 0.0042  |
| Dodecanoylcarnitine    | 0.0071   | 0.0005  | 0.0071   | 0.0072   | 0.0001  | 0.0072  |
| Tetradecanoylcarnitine | 0.0040   | 0.0001  | 0.0040   | 0.0025   | 0.0003  | 0.0026  |
| Palmitoylcarnitine     | 0.0115   | 0.0027  | 0.0113   | 0.0075   | 0.0009  | 0.0074  |
| Oleylcarnitine         | 0.0069   | 0.0002  | 0.0070   | 0.0064   | 0.0011  | 0.0061  |
| Stearyl carnitine      | 0.0151   | 0.0036  | 0.0143   | 0.0127   | 0.0004  | 0.0125  |

---



## Reference

1. D. Badillo-Sanchez, D. Chelazzi, R. Giorgi, A. Cincinelli and P. Baglioni, *Sci Rep*, 2019, **9**, 10.
2. M. McGill, G. P. Holland and D. L. Kaplan, *Macromol. Rapid Commun.*, 2019, **40**, 14.
3. N. Qin, S. Q. Zhang, J. J. Jiang, S. Gilbert Corder, Z. G. Qian, Z. T. Zhou, W. Lee, K. Y. Liu, X. H. Wang, X. X. Li, Z. F. Shi, Y. Mao, H. A. Bechtel, M. C. Martin, X. X. Xia, B. Marelli, D. L. Kaplan, F. G. Omenetto, M. K. Liu and T. H. Tao, *Nat. Commun.*, 2016, **7**, 8.
4. S. J. Ling, Z. M. Qi, D. P. Knight, Z. Z. Shao and X. Chen, *Biomacromolecules*, 2011, **12**, 3344-3349.
5. J. D. van Beek, L. Beaulieu, H. Schafer, M. Demura, T. Asakura and B. H. Meier, *Nature*, 2000, **405**, 1077-1079.
6. D. Badillo-Sanchez, D. Chelazzi, R. Giorgi, A. Cincinelli and P. Baglioni, *Polym. Degrad. Stabil.*, 2018, **157**, 53-62.
7. T. Asakura, *Molecules*, 2021, **26**, 20.
8. T. Shu, J. Cui, Z. C. Lv, L. T. Cao, J. Ren and S. J. Ling, *Soft Matter*, 2021, **17**, 9579-U9512.
